## **Probing the proton release by Photosystem II in the S<sub>1</sub> to S<sub>2</sub> high-spin transition.**

Alain Boussac<sup>1\*</sup>, Miwa Sugiura<sup>2</sup>, Julien Sellés<sup>3</sup>

<sup>1</sup> I<sup>2</sup>BC, UMR CNRS 9198, CEA Saclay, 91191 Gif-sur-Yvette, France.

<sup>2</sup> Proteo-Science Research Center, and Department of Chemistry, Graduate School of Science and Technology, Ehime University, Bunkyo-cho, Matsuyama, Ehime 790-8577, Japan.

<sup>3</sup> Institut de Biologie Physico-Chimique, UMR CNRS 7141 and Sorbonne Université, 13 rue Pierre et Marie Curie, 75005 Paris, France.

\*Corresponding authors: [alain.boussac@cea.fr](mailto:alain.boussac@cea.fr)

The authors declare that they have no conflict of interest.

ORCID numbers:

Alain Boussac: 0000-0002-3441-3861

Julien Sellés: 0000-0001-9262-8257

## Abbreviations:

Chl, chlorophyll; Chl<sub>D1</sub>/Chl<sub>D2</sub>, accessory Chl's on the D1 or D2 side, respectively; PSII, Photosystem II; MES, 2-(*N*-morpholino) ethanesulfonic acid; HEPES, 4-(2-hydroxyethyl)-1-piperazine ethane sulfonic acid. P<sub>680</sub>, primary electron donor; P<sub>D1</sub> and P<sub>D2</sub>; Chl monomer of P<sub>680</sub> on the D1 or D2 side, respectively, Phe<sub>D1</sub> and Phe<sub>D2</sub>, pheophytin on the D1 or D2 side, respectively; Q<sub>A</sub>, primary quinone acceptor; Q<sub>B</sub>, secondary quinone acceptor; Tyr<sub>Z</sub>, redox active tyrosine 161 of D1; WT\*3, *T. elongatus* mutant strain containing only the *psbA<sub>3</sub>* gene and a His<sub>6</sub>-tag on the C-terminus of CP43. EPR, Electron Paramagnetic Resonance spectroscopy; EDNMR, ELDOR-detected Nuclear Magnetic Resonance; ELDOR, Electron-Electron Double Resonance; SQR, sum of the squares of the residues.

## Abstract

The stoichiometry and kinetics of the proton release were investigated during each transition of the S-state cycle in Photosystem II (PSII) from *Thermosynechococcus elongatus* containing either a  $\text{Mn}_4\text{CaO}_5$  (PSII/Ca) or a  $\text{Mn}_4\text{SrO}_5$  (PSII/Sr) cluster. The measurements were done at pH 6.0 and pH 7.0 knowing that, in PSII/Ca at pH 6.0 and pH 7.0 and in PSII/Sr at pH 6.0, the flash-induced  $\text{S}_2$ -state is in a low-spin configuration ( $\text{S}_2^{\text{LS}}$ ) whereas in PSII/Sr at pH 7.0, the  $\text{S}_2$ -state is in a high-spin configuration ( $\text{S}_2^{\text{HS}}$ ) in half of the centers. Two measurements were done; the time-resolved flash dependent *i*) absorption of either bromocresol purple at pH 6.0 or neutral red at pH 7.0 and *ii*) electrochromism in the Soret band of  $\text{P}_{\text{D1}}$  at 440 nm. The fittings of the oscillations with a period of four indicate that one proton is released in the  $\text{S}_1$  to  $\text{S}_2^{\text{HS}}$  transition in PSII/Sr at pH 7.0. It was earlier suggested that the proton released in the  $\text{S}_2^{\text{LS}}$  to  $\text{S}_3$  transition is released in a  $\text{S}_2^{\text{LS}}\text{TyrZ}^\bullet \rightarrow \text{S}_2^{\text{HS}}\text{TyrZ}^\bullet$  transition before the electron transfer from the cluster to  $\text{TyrZ}^\bullet$  occurs. The release of a proton in the  $\text{S}_1\text{TyrZ}^\bullet \rightarrow \text{S}_2^{\text{HS}}\text{TyrZ}$  transition would logically imply that this proton release is missing in the  $\text{S}_2^{\text{HS}}\text{TyrZ}^\bullet$  to  $\text{S}_3\text{TyrZ}$  transition. Instead, the proton release in the  $\text{S}_1$  to  $\text{S}_2^{\text{HS}}$  transition in PSII/Sr at pH 7.0 was mainly done at the expense of the proton release in the  $\text{S}_3$  to  $\text{S}_0$  and  $\text{S}_0$  to  $\text{S}_1$  transitions. However, at pH 7.0, the electrochromism of  $\text{P}_{\text{D1}}$  seems larger in PSII/Sr when compared to PSII/Ca in the  $\text{S}_3$  state. This observation points to the complex link between proton movements in and immediately around the  $\text{Mn}_4$  cluster and the mechanism leading to the release of protons into the bulk.

## Introduction

Oxygenic photosynthesis is responsible for most of the energy input on Earth by converting the solar energy into fibers, foods and fuels. This process occurs in cyanobacteria, algae and higher plants. Photosystem II (PSII), the water-splitting enzyme, is at the heart of this process; see for example [1] for a recent view with an evolutionary perspective.

Mature PSII generally consists of 20 subunits with 17 trans-membrane and 3 extrinsic membrane proteins. The PSII binds 35 chlorophylls *a* (Chl-*a*), 2 pheophytins (Phe), 1 membrane b-type cytochrome, 1 extrinsic c-type cytochrome (in cyanobacteria and red algae), 1 non-heme iron, 2 plastoquinones (Q<sub>A</sub> and Q<sub>B</sub>), the Mn<sub>4</sub>CaO<sub>5</sub> cluster, 2 Cl<sup>-</sup>, 12 carotenoids and 25 lipids [2,3]. Recently, the 4<sup>th</sup> extrinsic PsbQ subunit has also been found in PSII from *Synechocystis* sp. PCC 6803 in addition to PsbV, PsbO and PsbU [4].

Among the 35 Chls, 31 are antenna Chls and 4 (P<sub>D1</sub>, P<sub>D2</sub>, Chl<sub>D1</sub> and Chl<sub>D2</sub>) together with the 2 Phe molecules constitute the reaction center of PSII. After the absorption of a photon by the antenna, the excitation energy is transferred to the photochemical trap that consists of the four Chls; P<sub>D1</sub>, P<sub>D2</sub>, Chl<sub>D1</sub>, Chl<sub>D2</sub>. After a few picoseconds, a charge separation occurs resulting ultimately in the formation of the Chl<sub>D1</sub><sup>+</sup>Phe<sub>D1</sub><sup>-</sup> and then in the P<sub>D1</sub><sup>+</sup>Phe<sub>D1</sub><sup>-</sup> radical pair states [5,6].

After the charge separation, P<sub>D1</sub><sup>+</sup> oxidizes Tyr<sub>Z</sub>, the Tyr161 of the D1 polypeptide, which then is reduced by the Mn<sub>4</sub>CaO<sub>5</sub> cluster, see [7] for one recent review. The electron on Phe<sub>D1</sub><sup>-</sup> is then transferred to Q<sub>A</sub>, the primary quinone electron acceptor, and then to Q<sub>B</sub>, the second quinone electron acceptor. Whereas Q<sub>A</sub> can be only singly reduced under normal conditions, Q<sub>B</sub> accepts two electrons and two protons before to leave its binding site and to be replaced by an oxidized Q<sub>B</sub> molecule, [8-11] and references therein.

The Mn<sub>4</sub>CaO<sub>5</sub> cluster that is oxidized by the radical Tyr<sub>Z</sub><sup>•</sup> after each charge separation cycles through five redox states denoted S<sub>*n*</sub>, where *n* stands for the number of stored oxidizing equivalents. The S<sub>1</sub>-state is stable in the dark and therefore S<sub>1</sub> is the preponderant state upon dark-adaptation. When the S<sub>4</sub>-state is formed after the 3<sup>rd</sup> flash of light given on dark-adapted PSII, two water molecules bound to the cluster are oxidized, O<sub>2</sub> is released and the S<sub>0</sub>-state is reformed, [12,13].

Thanks to the advent of serial femtosecond X-ray free electron laser crystallography, structures of the Mn<sub>4</sub>CaO<sub>5</sub> cluster have been resolved in the dark-adapted state with the 4 Mn ions in a redox state as close as possible to that in the S<sub>1</sub> state, *i.e.* Mn<sup>III</sup><sub>2</sub>Mn<sup>IV</sup><sub>2</sub> [3,14]. The Mn<sub>4</sub>CaO<sub>5</sub> structure resemble a distorted chair including a μ-oxo-bridged cuboidal Mn<sub>3</sub>O<sub>4</sub>Ca unit with a fourth Mn attached to this core structure *via* two μ-oxo bridges involving O<sub>4</sub> and

O5. After a further refinement of the electron density maps some works could indicate an heterogeneity in the valence of Mn ions between the two PSII monomers and/or show a lower than expected oxidation state of some Mn ions [15-17]. However, other groups [18-20] do not share such a conclusion mainly by taking into account the Jahn–Teller effect on the orientation of the bondings of the Mn<sup>III</sup>.

Recently, important progresses have been done in the resolution of the crystal structures in the S<sub>2</sub> and S<sub>3</sub> states [21-24]. The structural changes identified in the S<sub>1</sub> to S<sub>2</sub> transition and to a greater extent in the S<sub>2</sub> to S<sub>3</sub> transition are too numerous to detail them in a few lines. Very briefly, these works show that, in S<sub>2</sub>, the changes in the structure of the cluster are minor and more or less correspond to those expected for the valence change of the Mn<sub>2</sub> from +III to +IV in the context of the high-valence option [18]. Importantly, water molecules in the O1 and O4 channels appeared localized slightly differently in S<sub>2</sub> than in S<sub>1</sub>. In contrast, in the S<sub>2</sub> to S<sub>3</sub> transition, major structural changes have been detected together with the insertion of a 6<sup>th</sup> oxygen (O6 or O<sub>x</sub>), belonging to the second water substrate molecule, into the cluster between the Mn1 and the bridging oxygen O5. In addition, an important movement of the Glu189 residue would allow its carboxylate chain to make a hydrogen bond with the protonated 6<sup>th</sup> oxygen in S<sub>3</sub>.

EPR data and computational studies indicate the existence of more than one structural forms of S<sub>1</sub>, S<sub>2</sub> and S<sub>3</sub>. The two S<sub>1</sub> EPR signals seen with a parallel mode detection at  $g \sim 4.8$  and  $g \sim 12$  [25-27] were recently explained by the orientational Jahn–Teller isomerism of the dangler Mn<sup>III</sup> [20]. The authors in [20] further suggested that this isomerism in the S<sub>1</sub> state is at the origin of the valence isomerism in the S<sub>2</sub>-state. Indeed, depending on the conditions, at least two S<sub>2</sub> EPR signals can be detected at helium temperatures. The first one has a low-spin value  $S = 1/2$ , S<sub>2</sub><sup>LS</sup>, characterized by a multiline signal made up of at least 20 lines separated by approximately 80 gauss, centered at  $g \sim 2.0$  and spread over roughly 1800 gauss [28-30]. The second configuration of S<sub>2</sub> is a high-spin ground state, S<sub>2</sub><sup>HS</sup>, with  $S \geq 5/2$ . In plant PSII, S<sub>2</sub><sup>HS</sup> may exhibit either a derivative-like EPR signal centered at  $g \sim 4.1$  [31,32] or more complex signals at higher  $g$  values [33,34]. In cyanobacterial PSII, the S<sub>2</sub><sup>HS</sup> EPR signal has a derivative-like EPR signal centered at  $g \sim 4.8$  [35,36].

In a computational work [37], it was proposed that the  $g \sim 4.1$  signals in plant PSII have almost the same coordination and environment as the  $g \sim 2.0$  signal but with the Mn<sup>III</sup> ion located on Mn4 in the S<sub>2</sub><sup>HS</sup> state instead on the Mn1 in the S<sub>2</sub><sup>LS</sup> state. This valence swap would be accompanied by a moving of the oxygen O5 from a position where it links the Mn4, Mn3 and the Ca in the S<sub>2</sub><sup>LS</sup> configuration to a position where it bridges the Mn1, Mn3 and Ca ions

in the  $S_2^{\text{HS}}$  configuration resulting into the so called closed cubane structure. In other computational works [38,39] the authors arrived at a very different model in which, starting from the  $S_2^{\text{LS}}$  configuration, the protonation of O4 would lead to an  $S = 5/2$  ground state when W1 is present as an aquo ligand. The further deprotonation of W1 to form a hydroxo ligand would then give rise to an  $S = 7/2$  ground state [38,39]. In the same work, it was proposed that the form  $S = 7/2$  was probably the form needed to progress to  $S_3$ . The fact that the  $S_2^{\text{HS}}$  closed cubane structure defined in [40,41] is not necessary to progress to  $S_3$  is in line with some earlier works [42]. Experimentally [35,36], the  $S_2^{\text{HS}}$  form able to progress to  $S_3$  at low temperatures is the  $g \sim 4.8$  form, *i.e.* the  $S = 7/2$  form in [38,39].

From an EPR point of view, the  $S_3$ -state also exhibits some heterogeneity. The majority of centers exhibit a spin  $S = 3$  ground state [43-45]. In this  $S = 3$  configuration, the four Mn ions of the cluster have a  $\text{Mn}^{\text{IV}}$  formal oxidation state with an octahedral ligation sphere in an open cubane structure [45]. In this model, the dangler  $\text{Mn}^{\text{IV}}$  ( $S = 3/2$ ) is antiferromagnetically coupled to the open cubane motif  $(\text{Mn}^{\text{IV}})_3$  with  $S = 9/2$ . The remaining centers are EPR invisible, *e.g.* [36]. The relationship between the different  $S_2$  and  $S_3$  configurations was recently investigated by EPR spectroscopy [36] and discussed in the context of the structural heterogeneities proposed from computational works [40]. In [40], the high-spin  $S_2$ -state was considered to be a closed cubane structure something that needs to be reconsidered in view of the proposals made in [38,39] and mentioned above.

A third  $S_3$  configuration with a broadened  $S_3$  signal was identified with EDNMR in the presence of glycerol [46]. Although the authors did not completely rule out the presence of a closed cubane, five-coordinate  $S_3$  form at the origin of this EPR signal, they favored a perturbation of the coordination environment at Mn4 and/or Mn3 in an open cubane  $S_3$  structure induced by glycerol. With X- and Q-band EPR experiments performed in the  $S_3$ -state of plant PSII, both in the perpendicular and parallel modes, a high-spin,  $S = 6$ , was shown to coexist with the  $S = 3$  configuration. This  $S = 6$  form was attributed to a water-unbound form of  $S_3$ , with the  $\text{Mn}^{\text{IV}}_3$  part of the cluster in ferromagnetic interaction with the unsaturated dangler  $\text{Mn}^{\text{IV}}$  [47]. Nevertheless the non-detection of these two forms of  $S_3$  by X-band EPR, it seems unlikely that they correspond to the EPR invisible  $S_3$  mentioned above. Indeed, the new  $S_3$  signals described in [46,47] are detectable in the presence of glycerol and methanol, whereas the formation of the  $(S_2\text{Tyrz}^\bullet)$ ' state upon a near-IR illumination in the centers in  $S_3$  defined as EPR invisible is inhibited in the presence of glycerol (and in the presence of methanol in plant PSII) [48,49]. Finally, computational works also suggested heterogeneities in  $S_3$  [50-52] with also a  $S = 6$  spin value [52,53].

None of the heterogeneities described above were detected in the crystallographic structures of S<sub>2</sub> and S<sub>3</sub> known to date [21-24]. It is quite possible that the structural differences that cause the differences identified in EPR are too small to be detectable given the resolution of the crystallographic data. This at least shows, if it were necessary, that spectroscopy remains an indispensable complement to crystallography.

The EPR data summarized above describes a static view of the S<sub>2</sub>- and S<sub>3</sub>-states configurations. Kinetically, it is well documented that the transition from S<sub>2</sub> to S<sub>3</sub> involved at least two phases. The faster phase with a  $t_{1/2} \leq 25 \mu\text{s}$  is attributed to a proton transfer/release. This fast phase precedes the electron transfer from S<sub>2</sub> to the TyrZ• that occurs with a  $t_{1/2} \leq 300 \mu\text{s}$  [54-58]. It was discussed earlier that the fast phase could correspond to the release of a proton in an intermediate step  $S_2^{\text{LS}}\text{TyrZ}^\bullet \rightarrow S_2^{\text{HS}}\text{TyrZ}^\bullet$  before the  $S_2^{\text{HS}}\text{TyrZ}^\bullet \rightarrow S_3^{\text{S=3}}$  transition occurs [35]. The existence of intermediate states in the S<sub>2</sub> to S<sub>3</sub> transition was tracked by following, at room temperature, the structural changes in the S<sub>2</sub> to S<sub>3</sub> transition at time points from 50  $\mu\text{s}$  to 200 ms after the 2<sup>nd</sup> flash [21]. Although no indication was found for a closed cubane intermediate this does not discard the model with S<sub>2</sub><sup>HS</sup> as an intermediate state. Indeed, we have seen above that the S<sub>2</sub><sup>HS</sup> may have an open cubane structure, *e.g.* [38,39]. In addition, a transient state, by definition, has a low concentration that makes its detection difficult. In an even more recent work [22], a structural dynamics in the water and proton channels was highlighted during the S<sub>2</sub> to S<sub>3</sub> transition.

The question of the existence of an intermediate state in the S<sub>2</sub> to S<sub>3</sub> transition remains. In particular, it is questionable whether the fast phase observed in this transition corresponds to a proton release/movement associated with the formation of a S<sub>2</sub><sup>HS</sup> state, as has been suggested [35,58]. If this is correct, we would expect to see a change in the flash pattern proton release in conditions in which the S<sub>2</sub>  $g \sim 4.8$  EPR signal is the flash-induced state. In order to probe this model, we have kinetically followed the flash dependent proton release in PSII/Ca and PSII/Sr at pH 6.0 and 7.0, knowing that at pH 7.0 half of the centers exhibit the S<sub>2</sub><sup>HS</sup> signal at  $g \sim 4.8$  in PSII/Sr in contrast to PSII/Ca. This was done by recording absorption changes of pH-responding dyes, *i.e.* bromocresol purple at pH 6.0 and neutral red at pH 7.0, *e.g.* [59,60]. As a control experiment, changes in the electrostatic environment of P<sub>D1</sub> undergone upon the reduction/oxidation and deprotonation/protonation reactions of the Mn<sub>4</sub>CaO<sub>5</sub> cluster were also followed by recording the time-resolved absorption change differences 440 nm-*minus*-424 nm during the S-state cycle, *e.g.* [58,61].

## Materials and Methods

The *Thermosynechococcus elongatus* strain used was the  $\Delta psbA_1$ ,  $\Delta psbA_2$  deletion mutant, referred to as either WT\*3-PSII or PsbA3-PSII [62]. This strain was constructed from the *T. elongatus* 43-H strain that had a His<sub>6</sub>-tag on the carboxy terminus of CP43 [63]. The cells were cultivated in the presence of either Ca<sup>2+</sup> or Sr<sup>2+</sup> [64]. PSII/Ca and PSII/Sr purifications were achieved with an identical protocol that was previously described [65].

Absorption changes measurements were done with a lab-built spectrophotometer [66] slightly modified as previously described [65]. The 440 nm-*minus*-424 nm experiments were performed as previously reported [58]. For that, the samples were diluted in 1 M betaine, 15 mM CaCl<sub>2</sub>, 15 mM MgCl<sub>2</sub>, and either 40 mM Mes adjusted at pH 6.0 or 40 mM Hepes at pH 7.0. The pH was adjusted with NaOH. The measurements with the dyes were done as previously reported [65,67]. In this case, the samples were diluted in 1 M betaine, 15 mM CaCl<sub>2</sub>, 15 mM MgCl<sub>2</sub>, and either 150  $\mu$ M bromocresol purple at pH 6.0 or 40  $\mu$ M neutral red adjusted at pH 7.0. PSII samples were dark-adapted for  $\sim$  1 h at room temperature (20–22°C) before the addition of 100  $\mu$ M phenyl *p*-benzoquinone (PPBQ) dissolved in dimethyl sulfoxide and 100  $\mu$ M ferricyanide. The pH of the stock solutions of ferricyanide (100 mM) was adjusted to either pH 6.0 or pH 7.0 prior to its addition to the samples. The chlorophyll concentration of all the samples was  $\sim$  25  $\mu$ g of Chl/mL. After the  $\Delta I/I$  measurements, the absorption of each diluted batch of samples was precisely controlled to avoid errors due to the dilution of concentrated samples. The  $\Delta I/I$  values were then normalized to  $A_{673} = 1.75$ , that is very close to 25  $\mu$ g Chl/mL with  $\epsilon \sim 70 \text{ mM}^{-1}\cdot\text{cm}^{-1}$  at 674 nm for dimeric PSII [68].

The fittings of the data were done as previously described [58,61,64,69] with the additional details given in the text by using the Excel solver. All the data are the average of 2 to 3 experiments done on different batches of PSII resulting from different purifications.

## Results

### *Stoichiometry of the S-state dependent proton release.*

After one-flash illumination given at pH 6.0 to dark-adapted PSII, *i.e.* in the S<sub>1</sub>-state, both PSII/Ca and PSII/Sr exhibit a  $S = 1/2$  low-spin configuration, S<sub>2</sub><sup>LS</sup>. At pH 7.0, the S<sub>2</sub><sup>LS</sup> state is the flash-induced state in PSII/Ca whereas in PSII/Sr a proportion of centers exhibits a S<sub>2</sub>-state in a  $S \geq 5/2$  high-spin configuration, S<sub>2</sub><sup>HS</sup>. In our previous work [35], in which the PSII



was first washed in a buffer-free medium and then the pH was directly adjusted in the EPR tubes by adding 100 mM of different buffers, we found that the pK value of the  $S_2^{LS} \leftrightarrow S_2^{HS}$  equilibrium was  $\sim 7.5$ . However, after this earlier work, we have found that such a protocol overestimated the pH values by  $\sim 0.5$  pH unit so that the pK of the  $S_2^{LS} \leftrightarrow S_2^{HS}$  equilibrium is actually  $\sim 7.0$  instead of 7.5. The data at pH 7.0 in PSII/Sr in this work therefore correspond to a situation in which 50 % of the centers are in  $S_2^{HS}$  state. It would have been much more comfortable for the interpretation of the results to do the experiment at pH values where the proportion of  $S_2^{HS}$  is greater. Unfortunately, for higher pH values than 7.0, the integrity of the PSII/Sr estimated by recording the amplitude of the  $S_2^{LS}$  and  $S_2^{HS}$  EPR signals after variable times (not shown), and by following the amplitude of the period four oscillations (not shown), decreases much faster than the time required for doing the experiments reported here (about 2 hours and half). This problem did not occurred in EPR experiments [35] since in this case the samples were frozen immediately after the addition of the buffers.

Fig. 1, shows the absorbance changes of either bromocresol purple at pH 6.0 (purple full circles in Panels A and B) or neutral red at pH 7.0 (red full circles in Panels C and D). The  $\Delta I/I$  were measured 100 ms after each flash, 400 ms apart, of the series. The measurements were done with PSII/Ca in Panels A and C and with PSII/Sr in Panels B and D. A proton released by PSII, *i.e.* an acidification of the bulk, results in a decrease of the absorption at 575 nm with bromocresol purple and in an increase of the absorption at 547 nm with neutral red. The wavelength of 547 nm was chosen because it corresponds to the isosbestic point of the C550 bandshift in PSII with PsbA3 as the D1 protein, *e.g.* [58].

In PSII/Ca, at pH 6.0 (Panel A), there was a large increase in the absorption after the first flash. Since no proton release is supposed to occur in the  $S_1$  to  $S_2$  transition in such a sample, this change in the  $\Delta I/I$  mainly corresponds to a proton uptake following the reduction of non-heme iron by  $Q_A^-$ . After the 5<sup>th</sup> flash the  $\Delta I/I$  change remained positive. This clearly indicates that there is also a proton uptake after the 5<sup>th</sup> flash (mainly the  $S_1$  to  $S_2$  transition during the second turnover). In PSII/Ca at pH 7.0 (Panel C), with neutral red, this absorption seemed much more pronounced. Indeed, at least until the 21<sup>st</sup> flash there was a negative contribution of the  $\Delta I/I$  after the 3<sup>rd</sup> and 4<sup>th</sup> flashes, the 7<sup>th</sup> and 8<sup>th</sup>, and so on, flashes. In the analysis of such experiments, the data from the first flash are usually discarded due to several non-oscillating contributions [61]. In previous works, we did not consider that the non-heme iron could contribute after the first flash [65,67,69]. The data in Panel A and C in Fig. 1 show that this is not completely true under the present conditions. Although the conclusions made

previously remain valid, the smallness of the effects that are expected here require to take into account the contribution of the non-heme iron after each flash of the series. To this end, the stoichiometry of the proton release was therefore estimated for different amounts of proton uptake occurring on each flash, assuming that this proton uptake is the same on all flashes from the 2<sup>nd</sup> onwards. This procedure is more or less equivalent to adding a constant offset to the proton release calculated as described previously [69]. This offset also takes into account the slow drift that was equally present on all flashes. This drift has an unknown origin and may vary from experiment to experiment. Part of this process probably involves the release of a proton due to the reoxidation of non-heme iron during the dark period between flashes.

Fig. 2 shows the results of these fittings at pH 6.0 for PSII/Ca in Panel A and for PSII/Sr in Panel B. Panel C and D shows the fittings at pH 7.0 for PSII/Ca and PSII/Sr, respectively. The X-axis corresponds to the different values of the offset, in  $\Delta I/I$  units, which were tested in the fitting procedure. This offset corresponds to the sum of the proton uptake and the amplitude of the drift 100 ms after the flash. The values  $h_0$  (green curve),  $h_1$  (black curve),  $h_2$  (red curve),  $h_3$  (blue curve) are the fitted  $\Delta I/I$  corresponding to the release of proton(s) in the  $S_0$  to  $S_1$ ,  $S_1$  to  $S_2$ ,  $S_2$  to  $S_3$  and  $S_3$  to  $S_0$  transitions, respectively, for each offset value. The yellow curves correspond to the sum of the squares of the residues (SQR) calculated from the 2<sup>nd</sup> to the 40<sup>th</sup> flash. At pH 6.0, the SQR was multiplied by -1 for a better visualisation of the curves in the graph.

At pH 6.0, in both PSII/Ca and PSII/Sr, whatever the offset value, there was no proton release (black curves) in the  $S_1$  to  $S_2$  transition. For offset values resulting in the smallest SQR, the proton release estimated from the relative amplitudes of the  $\Delta I/I$  was similar in the  $S_2$  to  $S_3$  (red curves) and  $S_0$  to  $S_1$  (green curves) transitions and almost twice in the  $S_3$  to  $S_0$  transition (blue curves) as generally found for the pattern of the proton release [59,60].

At pH 7.0, in PSII/Ca, when the SQR was the smallest, the proton release on the  $S_1$  to  $S_2$  transition remained either zero (or very small if not zero). In the  $S_0$  to  $S_1$  transition, the proton release became smaller than in the  $S_2$  to  $S_3$  transition as observed in PSII from plant [60]. In PSII/Sr, at pH 7.0, the proton release in the  $S_1$  to  $S_2$  transition significantly increased to  $\sim 0.5$  and that constitutes the main result of this experiment. These observations will be further discussed with the analysis of the kinetics in Fig. 4. However, we can already note that the larger proton release in the  $S_1$  to  $S_2$  transition in PSII/Sr at pH 7.0 was done in part at the expense of the proton release in the  $S_3$  to  $S_0$  transition when compared to the situation in PSII/Ca at pH 7.0. Table 1 summarizes the results of the fittings. The crosses joined by dashed lines in Fig. 1

are the fits using the values reported in Table 1. The sums of the  $\Delta I/I$  for an offset of  $\sim -800$  at pH 7.0 are comparable in PSII/Ca and PSII/Sr which shows that the apparent smaller amplitudes of the oscillations at this pH are due to a different stoichiometry of the proton release.

#### *Flash-dependence of the 440 nm-minus-424 nm electrochromism.*

A way to measure the charge(s) in and around the  $Mn_4(Ca/Sr)O_5$  cluster is to record the electrochromic band-shifts in the Soret region of the  $P_{D1}$  absorption spectrum at 440 nm. This measurement therefore takes into account the proton uptake/release, *e.g.* [58,60] and references therein. For the removal of the contributions due to the reduction of  $Q_A$  the  $\Delta I/I$  at 424 nm was also measured. Indeed, the electrochromism due to  $Q_A^-$  equally contributes at 440 nm and 424 nm [70]. The amplitude of the 440 nm-*minus*-424 nm difference was then plotted. Unlike the situation with the dyes, the electrochromism is not contaminated by the reduction/oxidation of the non-heme iron and the associated protonation/deprotonation [71,72]. The simulation of the oscillations was therefore done without this contribution as described previously for the oscillations at other wavelengths [61,64].

Fig. 3 shows the 440 nm-*minus*-424 nm differences induced by each flash of a series given on dark-adapted PSII and measured 100 ms after these flashes. Data in Panels A and B were obtained at pH 6.0 and data in Panels C and D at pH 7.0. The samples were PSII/Ca in Panels A and C and PSII/Sr in Panels B and D. The red full circles are the experimental data and the crosses joined by dashed lines are the results of the fitting procedure. Table 1 summarizes the results from the fittings.

At pH 6.0, the oscillations with a period of four were clearly detectable at least until the 40<sup>th</sup> flash in both PSII/Ca and PSII/Sr. At pH 7.0, although the oscillations persisted at least until the 40<sup>th</sup> flash in Fig. 1, the oscillations of the electrochromism significantly decreased after the 25<sup>th</sup> flash in both PSII/Ca and PSII/Sr. In the four cases, the larger electrochromism is detected on the 1<sup>st</sup>, 5<sup>th</sup>, 9<sup>th</sup> and so on, flashes, *i.e.* in the  $S_1TyrZ^\bullet$  to  $S_2TyrZ$  transition when the oxidation of the  $Mn_4$  cluster is not, or only partially, compensated by a proton release. In the four samples, after the 2<sup>nd</sup> flash and the 4<sup>th</sup> flash, *i.e.* in the  $S_2TyrZ^\bullet$  to  $S_3TyrZ$  and  $S_0TyrZ^\bullet$  to  $S_1TyrZ$  transitions, the electrochromism is minimum as expected since a proton release occurs with the oxidation of the  $Mn_4$  cluster. After the 3<sup>rd</sup> flash, *i.e.* in  $S_3TyrZ^\bullet$  to  $S_0TyrZ$  transition, the electrochromism is negative because the cluster is fully reduced and 1 to 2 protons are released. Nevertheless these similarities, small but significant differences are visible, particularly in PSII/Sr at pH 7.0. Indeed, after the first flash, the amplitude of the absorption change was

relatively smaller than in PSII/Ca at pH 7.0. In compensation, after the 2<sup>nd</sup> flash, the change in the absorption was positive in PSII/Sr and negative in PSII/Ca. These differences either did not exist or were less pronounced at pH 6.0 and it is tempting to explain them by a release of proton in a fraction of the centres in PSII/Sr at pH 7.0 after the 1<sup>st</sup> flash as suggested by the result of the experiment reported in Fig. 1. These observations are further analysed with the kinetics shown in Fig. 5.

#### *Kinetics of the S-state dependent proton release.*

Fig. 4 shows the kinetics of the decays of the absorption changes of either *i*) bromocresol purple at pH 6.0 with PSII/Ca (Panel A) and PSII/Sr (Panel B) or *ii*) neutral red at pH 7.0 with PSII/Ca (Panel C) and PSII/Sr (Panel D). The measurements were done after the 1<sup>st</sup> (black points), the 2<sup>nd</sup> (red points), the 3<sup>rd</sup> (blue points) and the 4<sup>th</sup> (green points) flashes given on dark-adapted PSII. The dashed lines joining are spline curves plotted for a better visualisation.

In PSII/Ca, at pH 6.0 (Panel A in Fig. 4), the kinetics were very similar to those already described at pH 6.3 [67]. After the first flash, the increase in the  $\Delta I/I$  with a  $t_{1/2}$  close to 300  $\mu\text{s}$  corresponds to the proton uptake following the reduction of the non-heme iron by  $\text{QA}^-$  which occurs with a  $t_{1/2} \sim 50 \mu\text{s}$  [10]. After the second flash, a proton release occurred with a  $t_{1/2}$  close to 60  $\mu\text{s}$ . After the third flash, a biphasic proton release kinetics was resolved. The fastest phase decayed with a  $t_{1/2}$  of  $\sim 40 \mu\text{s}$  and the slowest one decayed with  $t_{1/2} \approx 1\text{-}2 \text{ ms}$  with a somewhat apparent smaller amplitude than the fast phase. These two phases in the proton release likely corresponds to the two steps in the  $\text{S}_3\text{TyrZ}^\bullet \rightarrow (\text{S}_3\text{TyrZ}^\bullet)' \rightarrow \text{S}_0\text{TyrZ}$  transitions, *e.g.* [54,70]. Since the number of protons released in this transition is 1.68 (Table 1) the data can be interpreted with 1 proton released in the first of these two steps and 0.68 in the second one. After the 4<sup>th</sup> flash, *i.e.* in the  $\text{S}_0\text{TyrZ}^\bullet$  to  $\text{S}_1\text{TyrZ}$  transition, a proton release occurred with a  $t_{1/2}$  of  $\sim 200 \mu\text{s}$ . This proton release in the  $\text{S}_0\text{TyrZ}^\bullet$  to  $\text{S}_1\text{TyrZ}$  transition is approximately 4 times slower than the oxidation of the  $\text{Mn}_4\text{CaO}_5$  cluster by  $\text{TyrZ}^\bullet$  [54,58]. For the longest times, the slow drift discussed above is clearly visible. It does not significantly perturbs the interpretation of the kinetics before 1 ms. For example, in this time range, it is clear that the amplitude of the absorption changes are comparable in the  $\text{S}_2\text{TyrZ}^\bullet$  to  $\text{S}_3\text{TyrZ}$ ,  $\text{S}_0\text{TyrZ}^\bullet$  to  $\text{S}_1\text{TyrZ}$  and  $\text{S}_3\text{TyrZ}^\bullet \rightarrow (\text{S}_3\text{TyrZ}^\bullet)'$  transitions. However, the drift may slightly decrease the amplitude of the slower phase in the  $\text{S}_3$  to  $\text{S}_0$  transition. The  $\Delta I/I$  changes observed between 5  $\mu\text{s}$  and 10  $\mu\text{s}$ , likely due electrostatic effects on the dyes [73], were previously discussed [65].

In PSII/Sr, at pH 6.0 (Panel B), the proton uptake after the first flash, with a  $t_{1/2}$  close to 1 ms, was significantly slower than in PSII/Ca. The proton release in the  $(S_3\text{TyrZ}^\bullet)' \rightarrow S_0\text{TyrZ}$  transition was also slowed down from  $\sim 1\text{-}2$  ms to  $\sim 5$  ms in agreement with previous results upon the Ca/Sr exchange [64,69]. In the 3 other transitions,  $S_2\text{TyrZ}^\bullet \rightarrow S_3\text{TyrZ}$ ,  $S_0\text{TyrZ}^\bullet \rightarrow S_1\text{TyrZ}$  and  $S_3\text{TyrZ}^\bullet \rightarrow (S_3\text{TyrZ}^\bullet)'$ , the kinetics of the proton release had similar  $t_{1/2}$  in PSII/Sr and PSII/Ca.

In PSII/Ca, at pH 7.0, the proton uptake on the first flash (black points) occurred with a  $t_{1/2} \leq 200$   $\mu\text{s}$ . This proton uptake occurs over a similar time range as the proton release in the other transitions. For example, after the 3<sup>rd</sup> flash, *i.e.* in the  $S_3\text{TyrZ}^\bullet \rightarrow (S_3\text{TyrZ}^\bullet)' \rightarrow S_0\text{TyrZ}$  transitions, a proton uptake was clearly detected after the proton release which occurs in the  $S_3\text{TyrZ}^\bullet \rightarrow (S_3\text{TyrZ}^\bullet)'$  and before the proton release occurring in the  $(S_3\text{TyrZ}^\bullet)' \rightarrow S_0\text{TyrZ}$  transition. Despite this complication, the kinetics in PSII/Ca at pH 7.0 appeared similar to those observed in PSII/Ca at pH 6.0. Table 2 shows an estimate of the  $t_{1/2}$  values after each flash. In PSII/Sr, at pH 7.0, the proton uptake on the first flash had a similar rate as in PSII/Ca at pH 7.0 and pH 6.0. Unfortunately, this proton uptake occurring on the first flash makes difficult the detection of the kinetics corresponding to the release of the  $\sim 0.5$  proton.

#### *S state-dependent kinetics of the electrochromism 440 nm-minus-424 nm.*

Fig. 5 shows the kinetics of the 440 nm-minus-424 nm differences in the four samples. Panels A and B were measured at pH 6.0 and Panels C and D at pH 7.0. The samples were PSII/Ca in Panels A and C and PSII/Sr in Panels B and D. The absorption change differences 440 nm-minus-424 nm are shown after the 1<sup>st</sup> flash (black), the 2<sup>nd</sup> flash (red), the 3<sup>rd</sup> flash (blue), and the 4<sup>th</sup> flash (green) given to dark-adapted samples. The dashed lines joining the data points are spline curves plotted for a better visualisation of the results. Table 2 shows an estimate of the  $t_{1/2}$  values after each flash.

After the 1<sup>st</sup> flash (black points), the 440 nm-minus-424 nm difference decayed with a  $t_{1/2}$  close to 20-30  $\mu\text{s}$  in PSII/Ca at both pH 6.0 (Panel A) and pH 7.0 (Panel C). This decay corresponds to the electron transfer from the  $\text{Mn}_4\text{CaO}_5$  cluster to TyrZ in  $S_1\text{TyrZ}^\bullet$  to  $S_2\text{TyrZ}$  transition since no proton release into the bulk is involved in this sample. In PSII/Sr at pH 6.0 (Panel B), and pH 7.0 (Panel D), the global  $t_{1/2}$  of the decay after the 1<sup>st</sup> flash was close to 200  $\mu\text{s}$ . However, we cannot discard an additional fast phase with a  $t_{1/2}$  close to 20  $\mu\text{s}$  in PSII/Sr at pH 7.0. The phase with a  $t_{1/2} \sim 200$   $\mu\text{s}$  is almost 10 times slower in PSII/Sr than in PSII/Ca. This difference between PSII/Ca and PSII/Sr is slightly larger than that one previously

estimated by following the increase of the absorption of the Mn<sub>4</sub> cluster in the UV [64]. In both PSII/Ca and PSII/Sr, the amplitude of the decay is approximately twice at pH 7.0 than at pH 6.0. This suggests that the electrostatic constraint, that is induced by the formation of TyrZ• in the S<sub>1</sub> state, and that is relaxed during the electron transfer in the S<sub>1</sub>TyrZ• to S<sub>2</sub>TyrZ transition, could be larger at pH 7.0 than as pH 6.0.

After the 2<sup>nd</sup> flash, two phases were previously identified at pH 6.5 [58]: a fast one with a  $t_{1/2} < 20$  μs and a slower one with a  $t_{1/2}$  between 100 and 200 μs. The slow phase, much slower than the proton release measured with bromocresol purple, has been proposed to correspond to the electron transfer from the Mn<sub>4</sub> cluster in the S<sub>2</sub> state to TyrZ• and the fast phase to a proton movement around the Mn<sub>4</sub> cluster possibly triggered by the formation of the S<sub>2</sub><sup>HS</sup> state in the presence of TyrZ•. In PSII/Ca at pH 6.0, Panel A in Fig. 5, the decay after the 2<sup>nd</sup> flash (red points) was qualitatively similar to that one described previously at pH 6.5 [58] with a  $t_{1/2}$  for the fast phase close to 10-20 μs. In PSII/Ca at pH 7.0 (Panel B), although less evident, the decay seemed also biphasic with  $t_{1/2}$  values close to 20 μs and 200 μs. In PSII/Sr, the kinetics was similar at pH 6.0 (Panel C) and pH 7.0 (Panel D), with the two  $t_{1/2}$  values close to 20 μs and 200 μs.

After the 3<sup>rd</sup> flash (blue points), two phases were detected in all cases. The fast phase very likely corresponds to the S<sub>3</sub>TyrZ• to (S<sub>3</sub>TyrZ•)' + H<sup>+</sup> transition and the slow one to the (S<sub>3</sub>TyrZ•)' to S<sub>0</sub>TyrZ + H<sup>+</sup> transition. In PSII/Ca, the amplitudes of the fast and slow phases were similar at pH 6.0 (Panel A) and pH 7.0 (Panel C) and the two  $t_{1/2}$ , ~ 20 μs and ~1 ms, were also similar. In PSII/Sr, the  $t_{1/2}$  of the slow phase increased to a value ~ 5 ms at pH 6.0 (Panel B) and pH 7.0 (Panel D). At pH 7.0, in PSII/Sr, a fast phase with a  $t_{1/2}$  ~ 20-30 μs was clearly present. This fast phase seemed to have a smaller amplitude at pH 6.0. The amplitude of the decay of the ΔI/I after the 3<sup>rd</sup> flash was similar in PSII/Ca and PSII/Sr at pH 7.0. In contrast, at pH 6.0, this amplitude was smaller at pH 6.0 in PSII/Sr than in PSII/Ca.

After the 4<sup>th</sup> flash, *i.e.* in the S<sub>0</sub>TyrZ• to S<sub>1</sub>TyrZ transition, in PSII/Ca at pH 6.5, two phases were previously identified and discussed [58]. The fast one with a  $t_{1/2}$  ~ 10-20 μs corresponds to the electron transfer and the slow one with a  $t_{1/2}$  ~ 200 μs to the proton release. This again confirmed that the electron transfer precedes the proton release in this transition [54,58]. In Fig. 5, the kinetics after the 4<sup>th</sup> flash (green points) are in full agreement with these conclusions for PSII/Ca at pH 6.0 and pH 7.0. In PSII/Sr at pH 7.0, the slow phase of the 440 nm-minus-424 nm difference with a  $t_{1/2}$  ~ 200-300 μs fits well with the kinetics of the proton release in Panel B of Fig. 4. Thus, the electron transfer with a  $t_{1/2}$  close to 10-20 μs also

precedes the proton release in the  $S_0\text{Tyrz}^\bullet$  to  $S_1\text{Tyrz}$  transition of PSII/Sr at pH 7.0. At pH 6.0, the situation seems to differ in PSII/Sr. Indeed, there is likely only one phase in the 440 nm-*minus*-424 nm difference decay with a  $t_{1/2} \sim 500 \mu\text{s}$ . This kinetics is either similar or slightly slower than the proton release occurring with a  $t_{1/2} \sim 300 \mu\text{s}$ , which suggests that at pH 6.0, in PSII/Sr, the proton release is coupled to (or slightly precedes) the electron transfer in the  $S_0\text{Tyrz}^\bullet$  to  $S_1\text{Tyrz}$  transition.

## Discussion

The configuration of the  $S_2$  state capable of progressing to  $S_3$  remains highly debated in the literature, *e.g.* [21,39,51,53,41,74-80]. Experimentally, in PSII from *T. elongatus*, a  $S_2^{\text{HS}}$ ,  $S \geq 5/2$  spin state, with a  $g$  value close to 4.8-4.9 could reach the  $S_3^{S=3}$  state upon an illumination at temperatures  $\leq 200$  K while the multiline  $S_2^{S=1/2}$  state could not [35,36]. In these works, the  $S_2^{\text{HS}}$  state was observed at high pH and it was suggested that increasing the pH would mimic the electrostatic influence of  $\text{Tyrz}^\bullet(\text{His}^+)$  by displacing the  $S_2^{\text{LS}} \leftrightarrow S_2^{\text{HS}}$  equilibrium to the right as proposed in a computational work [74]. In this model, at normal pH values, the rapidly released proton in the  $S_2$  to  $S_3$  transition before the electron transfer occurs [35,54-58], *i.e.* in the  $S_2^{\text{LS}}\text{Tyrz}^\bullet(\text{His}^+)$  state, was proposed to correspond to the formation of the  $S_2^{\text{HS}}$  state triggered by  $\text{Tyrz}^\bullet(\text{His}^+)$  [35]. In such a model, a change in the flash pattern of the proton release is expected when the flash-induced  $S_2$ -state is high-spin instead of low-spin. This is what we have been looking for in this work. For that, we have followed the proton release in PSII/Ca and PSII/Sr at pH 6.0 and 7.0, knowing that at in PSII/Ca at pH 6.0 and 7.0 and in PSII/Sr at pH 6.0 there is no flash induced  $S_2^{\text{HS}}$  state. In contrast, about half of the centers in PSII/Sr exhibit  $S_2^{\text{HS}}$  signal at  $g \sim 4.8$  at pH 7.0. Given the incredible amount of literature describing different sequence of events in the  $S_2$  to  $S_3$  transition, it has become impossible, in a normal article, to discuss all of them and, instead, we have focus our attention on those that we feel are most relevant to the present work. One of the difficulties in analysing the data is the pH dependence in PSII/Ca whereas there is no  $S_2^{\text{HS}}$  formed at pH 7.0 in this material. Therefore, comparison of the data in PSII/Sr at pH 7.0 must be made not only with PSII/Sr at pH 6.0 but also with PSII/Ca at pH 7.0 if necessary.

In PSII/Ca at pH 6.0, the flash pattern for the release into the bulk of the 4 protons is 1.20, 0.0, 1.13, 1.68 for the  $S_0 \rightarrow S_1$ ,  $S_1 \rightarrow S_2$ ,  $S_2 \rightarrow S_3$ ,  $S_3 \rightarrow S_0$  transitions, respectively (Table 1). This pattern is comparable, but not identical, to that found in plant PSII at pH 6.0 obtained in

a similar experiment that was found to be 1.52, 0.05, 1.0, 1.43 [60]. In [60], the value for the  $S_3 \rightarrow S_0$  transition was computed as the complement to 4 of the sum of the 3 other transitions. The main difference PSII from plant when compared to PSII from *T. elongatus* is a higher value for the  $S_0 \rightarrow S_1$  transition compensated by a lower value for the  $S_3 \rightarrow S_0$  transition. In the FTIR conditions at pH 6.0, the pattern was found to be 0.94, 0.28, 1.20, 1.57 in PSII from *T. elongatus* [81]. In plant PSII at pH 7.0, the flash pattern for the proton release into the bulk was 1.10, 0.32, 1.0, 1.58 [60]. In PSII/Ca from *T. elongatus*, at pH 7.0, a significantly different pattern is found here with 0.77, 0.02, 1.13, 2.08. Nevertheless, in PSII/Ca from *T. elongatus* and from plant, the number of protons released in the  $S_2 \rightarrow S_3$  is either very weakly or not affected upon increasing the pH value from 6.0 to 7.0. The other similarities between these two PSII observed upon an increase of the pH from 6.0 to 7.0 is a decrease of the number of proton(s) that are released in the  $S_0 \rightarrow S_1$  transition and an increase of the number of proton(s) that are released in the  $S_3 \rightarrow S_0$  transitions. The important difference is the release of 0.32 proton in the  $S_1 \rightarrow S_2$  transition in plant PSII whereas in *T. elongatus* the value remains close to 0. This difference is difficult to rationalize because there is no report in the literature showing a pH dependence of the  $S_1$  to  $S_2^{LS}$  transition between 6.0 and 7.0, e.g. [82]. Therefore, it more likely originates from differences in the pK, in  $S_1$  and  $S_2$ , of some of the groups involved in the egress of protons upon the oxidation of the  $Mn_4CaO_5$  cluster. For that reason, it is more justified to compare the pH effects in PSII from only one origin, here *T. elongatus*. In addition, there is no study describing the flash pattern for the proton release in PSII/Sr from plant and the properties of the  $S_2^{HS}$  state are different in plant PSII from an EPR point of view.

In PSII/Sr from *T. elongatus*, at pH 6.0, the flash pattern is 1.35, 0.0, 1.11, 1.54 for the  $S_0 \rightarrow S_1$ ,  $S_1 \rightarrow S_2$ ,  $S_2 \rightarrow S_3$ ,  $S_3 \rightarrow S_0$  transitions, respectively. These values are very close to those found earlier, at pH 6.3, in PSII/Sr in which  $Cl^-$  was replaced with  $Br^-$ . Indeed, the pattern was 1.16, 0.02, 1.19, 1.63 [69]. These values are also very close to those found in PSII/Ca which indicates that either the pK values of the groups involved in the proton release are neither affected by the  $Ca^{2+}/Sr^{2+}$  exchange nor by the  $Cl^-/Br^-$  exchange, or that at pH 6.0 we are far from these pK values. This later possibility would agree with the low ( $\leq 4.5$ ) and high ( $\geq 9.5$ ) S-state dependent pK values of 3 of the 4 groups proposed to be involved in the different  $S_n$  states that were calculated in [60].

In PSII/Sr at pH 7.0 the number of proton(s) released in the  $S_1 \rightarrow S_2$  increased to 0.47. This increase seems mainly compensated by a decreased in the  $S_0 \rightarrow S_1$  transition with 1.02



proton at pH 7.0 instead of 1.35 at pH 6.0 when the reference is the PSII/Sr at pH 6.0.

However, increasing the pH in PSII/Ca from 6.0 to 7.0 without favoring the formation of  $S_2^{\text{HS}}$  also increases the number of proton released in the  $S_0$  to  $S_1$  transition so that the step in which there is a missing proton when the  $S_2^{\text{HS}}$  is formed remains to be identified with certainty.

The 440 nm-*minus*-424 nm differences take into account the increase/decrease of the electrostatic environment of  $P_{\text{D1}}$ . In the S-state transitions in which the oxidation of the cluster is preceded/followed by a proton release, the 440 nm-*minus*-424 nm difference is expected to be small. Conversely, the 440 nm-*minus*-424 nm difference is expected to be larger when no proton is released. This is what is observed in PSII/Ca at both pH 6.0 and pH 7.0 and in PSII/Sr at pH 6.0 where no proton are released in the  $S_1$  to  $S_2$  transition. For a same proton pattern, the 440 nm-*minus*-424 nm differences are smaller at pH 6.0 in PSII/Sr than in PSII/Ca. This shows that the change in the H-bond network around the  $\text{Mn}_4$  cluster induced by the  $\text{Ca}^{2+}/\text{Sr}^{2+}$  exchange have a global consequence on the electrostatic environment of  $P_{\text{D1}}$  in the S-state cycle.

In PSII/Sr at pH 7.0, in the  $S_1$  to  $S_2$  transition, the 440 nm-*minus*-424 nm difference is not smaller than at pH 6.0 while 0.47 protons are released. However, whereas in PSII/Ca the  $\epsilon_1$  extinction coefficient at pH 7.0 is 1.37 times the value at pH 6.0, in PSII/Sr the  $\epsilon_1$  extinction coefficient at pH 7.0 is only 1.14 times the value at pH 6.0. This suggests that the electrostatic constraint on  $P_{\text{D1}}$  differs in the  $S_2^{\text{HS}}$  and  $S_2^{\text{LS}}$  states and therefore that the H bond network is different in the two spin states of  $S_2$ . Such a result is not surprising since, whatever the structural model for the  $S_2^{\text{HS}}$  configuration, the distribution of the charges inside and protons inside and around the cluster differs significantly from those in the  $S_2^{\text{LS}}$  configuration, *e.g.* [39,41,74,75,77]. We also know that long-range changes in the  $\text{Mn}_4\text{CaO}_5$  environment can promote the stabilization of the  $S_2^{\text{HS}}$  state at the expense of the  $S_2^{\text{LS}}$  state as in the V185T mutant [67]. Similarly, a mutation of a  $\text{Mn}_4\text{CaO}_5$  ligand that stabilizes the  $S_2^{\text{HS}}$  state, as the D170E mutation, also modifies the H-bond network, *e.g.* [83].

The S-state dependent proton release shows a correlation between the formation of the  $S_2^{\text{HS}}$  state and the release of a proton in the  $S_1$  to  $S_2$  transition. This correlation does not necessarily imply a causality even if that seems reasonable. Under conditions where the  $S_2^{\text{LS}}$  state is the stable  $S_2$  state, this proton release occurs in the  $S_2^{\text{LS}}\text{TyrZ}^\bullet$  state since it is well established that it precedes the electron transfer step [54-58]. In the model proposed here, this proton release would result in the formation of the  $S_2^{\text{HS}}\text{TyrZ}^\bullet$  state which would be the competent configuration for the formation of  $S_3$ . Under conditions where the  $S_2^{\text{HS}}$  state becomes the stable  $S_2$  state, the release of the proton is proposed to occur in the  $S_1$  to  $S_2$

transition. At this step, we cannot discard the possibility that the  $S_2^{LS}$  state is a transient state is a sequence of events as  $S_1\text{Tyrz}^\bullet \rightarrow S_2^{LS}\text{Tyrz} \rightarrow S_2^{HS}\text{Tyrz}$ . Because the exchange of  $\text{Ca}^{2+}$  with  $\text{Sr}^{2+}$  stabilizes the  $S_2^{HS}$  state, in the context of the model proposed in [38,39], that would mean that in PSII/Sr the pK of O4 increases and/or that of W1 decreases since the apparent pK of the  $g \sim 2.0$  to  $g \sim 4.8$  conversion is lower in PSII/Sr than in PSII/Ca [35].

In a recent computational work, the consequences of the  $\text{Ca}^{2+}/\text{Sr}^{2+}$  exchange on the  $S_2$  to  $S_3$  transitions has been analyzed [84]. In this model, two transient states with a closed cubane  $S_2^{HS}$  exhibiting a  $g = 4.1$  configuration have been probed. It was found that the more stable  $S_2^{HS}$  state, in PSII/Ca, was with  $\text{W3} = \text{OH}^-$  (with pK = 6.5) and with a neutral His190 whereas in PSII/Sr the more stable state was with  $\text{W3} = \text{OH}_2$  (with pK = 10.3) and with His190( $\text{H}^+$ ). If do not consider the validity or not of the closed cubane option, something that is not a minor issue, these findings, which take into account principally the pK of W3, seems to us difficult to reconcile with our experimental data since in PSII/Ca we would expect W3 as largely deprotonated at pH 8.0 with a pK value of 7 whereas the  $S_2$  state is mostly in the low-spin configuration [35]. Moreover, preliminary experiments done in plant PSII under conditions in which the  $S_2^{HS}$  form exhibits the  $g \sim 4.1$  signal suggest that this  $S_2^{HS}$  state is unable to progress to the  $S_3^{S=3}$  state at 198 K and that, even at pH  $\sim 8$  (unpublished). Interestingly, a  $g \sim 4.8$ - $4.9$  EPR signal with a resolved hyperfine structure was recently detected in plant PSII after the removal of the extrinsic proteins [85] and it would be interesting to know if this state is able to progress to  $S_3$  at low temperatures.

A proton leaving W1 is, in several models, proposed to be transferred to either the Asp61, *e.g.* [39,74,78], or to a close by water molecule (W19 in [39]) thus replacing the  $\text{H}^+$  of W19 which has moved onto O4. In other mechanisms [21,75] a proton moving towards either Asp61 or W25 would originate from W3, before W3 leaves the  $\text{Ca}^{2+}$  and binds to Mn1. In all cases, the proton that is released into the bulk cannot be the proton moving onto either Asp61 or W19 or W25, but a proton connected to these proton acceptors *via* a H-bond network reorganized differently at pH 7.0 in PSII/Sr and PSII/Ca. That would explain why the proton released in the  $S_1$  to  $S_2^{HS}$  transition in PSII/Sr at pH 7.0 seems not missing in the  $S_2^{HS}$  to  $S_3$  transition.

The issue concerning the proton and water movements in the  $S_2$  to  $S_3$  transition has been addressed recently by following the structural changes in the water and proton channels at times 50  $\mu\text{s}$ , 150  $\mu\text{s}$ , 250  $\mu\text{s}$ , after the second flash [22]. The pieces of information obtained are impressive and impossible to be listed here. One of the conclusions is that the O1 channel is more likely a water channel than a proton channel. This in agreement with the analysis of

the Arg323Glu mutant in which the dielectric relaxation of the protein in the Tyr<sub>Z</sub> to P<sub>680</sub><sup>+</sup> electron transfer is delayed whereas no change in the proton release are observed [65]. It remains that the state identified in [22] 50 μs after the second flash in the S<sub>2</sub> to S<sub>3</sub> transition could correspond to the structural arrangement favoring the formation of the S<sub>2</sub><sup>HS</sup> state. Indeed, 50 μs after the second flash, the proton release has already occurred almost completely. Secondly, the structural changes observed at longer times than 50 μs are those accompanying the electron transfer between the Mn<sub>4</sub>CaO<sub>5</sub> complex and Tyr<sub>Z</sub><sup>•</sup>.

Table 2 shows the  $t_{1/2}$  of the kinetics for the proton releases and for the 440 nm-*minus*-424 nm differences from the curves in Figures 4 and 5. The  $t_{1/2}$  values are the time at half of the decay of the kinetics determined without a fitting. It should be kept in mind that the kinetics of the 440 nm-*minus*-424 nm differences concerning the proton release steps are necessarily faster than the kinetics of the appearance of the proton into the bulk which is the last step of the proton egress mechanism, see [58,60].

Table 2 shows that the proton uptake associated with the reduction of the non heme iron after the 1<sup>st</sup> flash is affected in PSII/Sr at pH 6.0, *i.e.* at a pH value where there is no contamination of the kinetics by a proton release in contrast to the situation at pH 7.0. In PSII/Ca, a pH dependence between 6.0 and 7.0 is not observed. Unfortunately, there is no report in the literature about the electron transfer from Q<sub>A</sub><sup>-</sup> to the oxidized non-heme iron in PSII/Sr that could help us to understand the origin of this pH dependence. It was reported that the Ca<sup>2+</sup>/Sr<sup>2+</sup> exchange slightly up-shifted the  $E_m(Q_A/Q_A^-)$  by ~ +27 mV [86], see however [87]. This increase could slightly slow down the reduction of oxidized non-heme iron at pH 6.0 when compared to PSII/Ca. However, the pH effect observed here on the rate of the proton uptake in PSII/Sr cannot be related to the pK values of the D1-H215 and Glu/Asp residues responsible for the  $E_m$  of the non-heme iron [88]. The positive point remains that at pH 7.0, the kinetics of the proton uptake are similar in PSII/Ca and PSII/Sr, which allows an easier comparison of the kinetics of the proton releases.

After the 3<sup>rd</sup> flash, the release of the first proton in the S<sub>3</sub> to S<sub>0</sub> transition, *i.e.* in the S<sub>3</sub>Tyr<sub>Z</sub><sup>•</sup> → (S<sub>3</sub>Tyr<sub>Z</sub><sup>•</sup>)' step, occurs at a similar rate in the four samples with a  $t_{1/2}$  of 40 μs. This  $t_{1/2}$  is in agreement with the fastest phase in the 440 nm-*minus*-424 nm difference. The kinetics of the 2<sup>nd</sup> proton in PSII/Sr at pH 7.0, *i.e.* in the (S<sub>3</sub>Tyr<sub>Z</sub><sup>•</sup>)' → S<sub>0</sub>Tyr<sub>Z</sub> step, with  $t_{1/2} \leq 5$  ms, seems faster than expected from the known slowing down from 1-2 ms in PSII/Ca to 5 ms in PSII/Sr for this step [64] whereas this slowing down is observed in the kinetics of the 440 nm-*minus*-424 nm difference at both pH 6.0 and pH 7.0. There is no clear explanation

now for that and this observation deserves to be further study in the future because it is a potential source of information on the mechanism of water oxidation. At least, it is not due to a drift of the pH value. Indeed, *i)* above pH 7.0 the sample is rapidly damaged something that is not supported by the kinetics after the 1<sup>st</sup>, 2<sup>nd</sup> and 4<sup>th</sup> flashes and *ii)* below pH 7.0 the kinetics of the proton release would be similar to that of the electron transfer something not observed.

In the the  $S_0\text{Tyrz}^\bullet$  to  $S_1\text{Tyrz}$  transition, *i.e.* after the 4<sup>th</sup> flash, the proton release occurred with a similar rate in the four samples with a  $t_{1/2}$  of 200-300  $\mu\text{s}$ . In this S-state transition, the proton release in PSII/Ca at pH 6.0 and pH 7.0 and in PSII/Sr at pH 7.0 occurs after the electron transfer that has a  $t_{1/2}$  of 10-20  $\mu\text{s}$  as previously discussed in detail *versus* the literature [58]. In PSII/Sr at pH 6.0 the kinetics of the 440 nm-*minus*-424 nm difference seems to have a single phase with a  $t_{1/2}$  of 500  $\mu\text{s}$  whereas the proton is released with a  $t_{1/2}$  of 300  $\mu\text{s}$ . This could suggest that at pH 6.0, in PSII/Sr, the proton release either precedes or occurs at the same time as the electron transfer at the opposite of the situation in PSII/Ca and PSII/Sr at pH 7.0.

## Conclusions

Both the stoichiometry and the kinetics of the proton release were followed in PSII/Ca and PSII/Sr at pH 6.0 and pH 7.0. At pH 7.0, the PSII/Sr exhibits a  $S_2^{\text{HS}}$  configuration in half of the centers whereas in PSII/Ca at pH 7.0 as at pH 6.0 and in PSII/Sr at pH 6.0 the Photosystem II is in a  $S_2^{\text{LS}}$  configuration after 1 flash. Several differences between PSII/Ca and PSII/Sr not yet reported in the literature or better seen here, were found. Among them, the 440 nm-*minus*-424 nm kinetics clearly show that the  $\text{Ca}^{2+}/\text{Sr}^{2+}$  exchange is slowing down by a factor 10 the  $S_1\text{Tyrz}^\bullet \rightarrow S_2$  transition. Previous measurements at 291 nm [64] were less accurate because at this wavelength the absorption coefficient of  $S_1\text{Tyrz}^\bullet$  and  $S_2$  are close. In addition, in the  $S_0$  to  $S_1$  transition, the electron transfer seems slowed down in PSII/Sr at pH 6.0 to occur almost coupled to the electron transfer in contrast to PSII/Ca at pH 6.0 in which the proton is released after the electron transfer.

The fittings of the oscillations with a period of four strongly indicate that, when half of the centers are in  $S_2^{\text{HS}}$  after one flash illumination, about 0.5 proton is released in the  $S_1$  to  $S_2$  transition. It is therefore suggested that the proton that is released into the bulk in the  $S_2$  to  $S_3$  transition, when the  $S_2^{\text{LS}}$  state is the most stable configuration, is released in the  $S_2^{\text{LS}}\text{Tyrz}^\bullet \rightarrow$

$S_2^{HS}TyrZ^\bullet$  transition before the electron transfer from the cluster to  $TyrZ^\bullet$  occurs. Such a model would imply that this proton would be missing in the following  $S_2^{HS}$  to  $S_3$  transition. Instead, it is principally missing either in the  $S_3$  to  $S_0$  transition or in the  $S_0$  to  $S_1$  transition while the global charge increase probed by the electrochromism of  $P_{D1}$  in the  $S_1$  to  $S_2$  transition seems smaller in PSII/Sr at pH 7.0 when compared to PSII/Ca. This observation would require further studies for a better understanding of the mechanism that links the proton movements in and around the cluster and the proton movements in the channels ultimately resulting by the release of protons into the bulk.

## Acknowledgments

This work has been in part supported by (i) the French Infrastructure for Integrated Structural Biology (FRISBI) ANR-10-INBS-05, (ii) the Labex Dynamo (ANR-11-LABX-0011-01) and (iii) the JSPS-KAKENHI Grant in Scientific Research on Innovative Areas JP17H064351 and a JSPS-KAKENHI Grant 21H02447. This is the last article on the topic of PSII oxygen evolution in my (AB) career. This is an opportunity for me to thank all my coauthors during these 40 years; first and foremost Miwa Sugiura and Bill Rutherford, but also Fabrice Rappaport who passed away too much early, Catherine Berthomieu, Rainer Hienerwadel, Julien Sellés and many other colleagues whose list would be too long here but who, I hope, will recognize themselves.

**Table 1:** Fitted values for the data shown in Figures 1 and 3.

| sample                             | dye    |                                |                                |                                |                                |              | 440 nm- <i>minus</i> -424 nm          |                                       |                                       |                                               |
|------------------------------------|--------|--------------------------------|--------------------------------|--------------------------------|--------------------------------|--------------|---------------------------------------|---------------------------------------|---------------------------------------|-----------------------------------------------|
|                                    | offset | $h_0$<br>$S_0 \rightarrow S_1$ | $h_1$<br>$S_1 \rightarrow S_2$ | $h_2$<br>$S_2 \rightarrow S_3$ | $h_3$<br>$S_3 \rightarrow S_0$ | $\Sigma h_i$ | $\epsilon_0$<br>$S_0 \rightarrow S_1$ | $\epsilon_1$<br>$S_1 \rightarrow S_2$ | $\epsilon_2$<br>$S_2 \rightarrow S_3$ | $-\Sigma \epsilon_i$<br>$S_3 \rightarrow S_0$ |
| PSII/Ca<br>pH 6.0                  | 1000   | -1879<br>(1.2)                 | 0<br>(0)                       | -1764<br>(1.13)                | -2627<br>(1.68)                | -6270        | -149                                  | 1306                                  | -90                                   | -1067                                         |
| PSII/Ca<br>pH 7.0                  | -800   | 716<br>(0.77)                  | 19<br>(0.02)                   | 1057<br>(1.13)                 | 1946<br>(2.08)                 | 3738         | -257                                  | 1792                                  | -131                                  | -1404                                         |
| PSII/Sr<br>pH 6.0                  | 600    | -1790<br>(1.35)                | 0<br>(0)                       | -1476<br>(1.11)                | -2054<br>(1.54)                | -5320        | -192                                  | 944                                   | -161                                  | -591                                          |
| PSII/Sr<br>pH 7.0                  | -800   | 873<br>(1.02)                  | 405<br>(0.47)                  | 884<br>(1.03)                  | 1266<br>(1.48)                 | 3428         | -63                                   | 1080                                  | 219                                   | -1237                                         |
| Plant PSII,<br>pH 6.0 <sup>1</sup> |        | (1.52)                         | (0.05)                         | (1.0)                          | (1.43)                         |              |                                       |                                       |                                       |                                               |
| Plant PSII<br>pH 7.0 <sup>1</sup>  |        | (1.10)                         | (0.32)                         | (1.0)                          | (1.58)                         |              |                                       |                                       |                                       |                                               |

$\Delta I/I \times 10^6$  values corresponding to the best fittings shown in Figures 1 and 3. The  $h_0$ ,  $h_1$ ,  $h_2$  and  $h_3$  values are the changes in the absorption of the dyes in the  $S_0$  to  $S_1$ ,  $S_1$  to  $S_2$ ,  $S_2$  to  $S_3$  and  $S_3$  to  $S_0$  transitions, respectively. The  $\Sigma h_i$  value corresponds to the total absorption change for one turnover (*i.e.*  $h_0 + h_1 + h_2 + h_3$ ) which corresponds to  $4 H^+$ . The values in brackets are the ratio  $h_i/\Sigma h_i$  which corresponds to stoichiometry of the proton released in the corresponding transition. The  $\epsilon_0$ ,  $\epsilon_1$ ,  $\epsilon_2$  values are the extinction coefficients corresponding to the  $S_0$  to  $S_1$ ,  $S_1$  to  $S_2$  and  $S_2$  to  $S_3$  transitions, respectively. By definition [61], the extinction coefficient of the  $S_3$  to  $S_0$  transition is  $-\Sigma \epsilon_i$  (*i.e.*  $-(\epsilon_0 + \epsilon_1 + \epsilon_2)$ ). In all the fittings the miss parameter, considered as identical in all the transitions, was found to be between 8 and 10 % and the proportion of centers in  $S_1$  between 90 and 100 %. <sup>1</sup>Data taken in [60].

Table 2 : Approximate  $t_{1/2}$  values of the kinetics shown in Figures 4 and 5.

| Sample            | dye                                            |                                                |                                                |                                                | 440 nm- <i>minus</i> -424 nm                   |                                                |                                                |                                                |
|-------------------|------------------------------------------------|------------------------------------------------|------------------------------------------------|------------------------------------------------|------------------------------------------------|------------------------------------------------|------------------------------------------------|------------------------------------------------|
|                   | 4 <sup>th</sup> flash<br>$S_0 \rightarrow S_1$ | 1 <sup>st</sup> flash<br>$S_1 \rightarrow S_2$ | 2 <sup>nd</sup> flash<br>$S_2 \rightarrow S_3$ | 3 <sup>rd</sup> flash<br>$S_3 \rightarrow S_0$ | 4 <sup>th</sup> flash<br>$S_0 \rightarrow S_1$ | 1 <sup>st</sup> flash<br>$S_1 \rightarrow S_2$ | 2 <sup>nd</sup> flash<br>$S_2 \rightarrow S_3$ | 3 <sup>rd</sup> flash<br>$S_3 \rightarrow S_0$ |
| PSII/Ca<br>pH 6.0 | (-) 200 $\mu$ s                                | (+) 300 $\mu$ s                                | (-) 60 $\mu$ s                                 | (-) 40 $\mu$ s, 1-2 ms                         | 10-20 $\mu$ s, 200 $\mu$ s                     | 20-30 $\mu$ s                                  | 10-20 $\mu$ s, 200 $\mu$ s                     | 20 $\mu$ s, 1 ms                               |
| PSII/Ca<br>pH 7.0 | (-) 200 $\mu$ s                                | (+) <200 $\mu$ s                               | (-) 60 $\mu$ s                                 | (-) 40 $\mu$ s, 2 ms                           | 10-20 $\mu$ s, 200 $\mu$ s                     | 20-30 $\mu$ s                                  | 20 $\mu$ s, 200 $\mu$ s                        | 20 $\mu$ s, 1 ms                               |
| PSII/Sr<br>pH 6.0 | (-) 300 $\mu$ s                                | (+) 1 ms                                       | (-) 60 $\mu$ s                                 | (-) 40 $\mu$ s, 5 ms                           | 500 $\mu$ s                                    | 200 $\mu$ s                                    | 20 $\mu$ s, 200 $\mu$ s                        | 10 $\mu$ s, 5 ms                               |
| PSII/Sr<br>pH 7.0 | (-) 200 $\mu$ s                                | (+) 200 $\mu$ s                                | (-) 60 $\mu$ s                                 | (-) 40 $\mu$ s, $\leq$ 5 ms                    | 10-20 $\mu$ s, 300 $\mu$ s                     | 200 $\mu$ s (20 $\mu$ s?)                      | 20 $\mu$ s, 200 $\mu$ s                        | 10-20 $\mu$ s, 5 ms                            |

Approximate  $t_{1/2}$  values of the kinetics in Figures 4 and 5 after 4<sup>th</sup>, 1<sup>st</sup>, 2<sup>nd</sup> and 3<sup>rd</sup> flashes, *i.e.* in the  $S_0$  to  $S_1$ ,  $S_1$  to  $S_2$ ,  $S_2$  to  $S_3$  and  $S_3$  to  $S_0$  transitions, respectively, in PSII/Ca and PSII/Sr at pH 6.0 and PH 7.0. The sign in brackets indicates a proton uptake with (+) and a proton release with (-).

## Legend of figures

### Figure 1:

Sequence of the amplitude of the absorption changes using a series of saturating flashes (spaced 400 ms apart). The full circles, shows the absorbance changes at 575 nm of either bromocresol purple (150  $\mu\text{M}$ ) at pH 6.0 (Panels A and B, purple full circles) or at 547 nm of neutral red (40  $\mu\text{M}$ ) at pH 7.0 (Panels C and D, red full circles). The measurements were done with PSII/Ca in Panels A and C and with PSII/Sr in Panels B and D. The samples ( $[\text{Chl}] = 25 \mu\text{g mL}^{-1}$ ) were dark-adapted for 1 h at room temperature before the addition of 100  $\mu\text{M}$  PPBQ dissolved in dimethyl sulfoxide and 100  $\mu\text{M}$  ferricyanide. The  $\Delta I/I$  were measured 100 ms after each flash. The black crosses joined by a continuous line are the fits of the data with the parameters listed in Table 1.

### Figure 2:

Results of the fittings at pH 6.0 for PSII/Ca in Panel A and for PSII/Sr in Panel B and at pH 7.0 for PSII/Ca in Panel C and for PSII/Sr in Panel D. The X-axis corresponds to different values of the offset, in  $\Delta I/I$  units, which were tested in the fitting procedure. This offset corresponds to the sum of the proton uptake and the amplitude of the drift 100 ms after the flash. The values  $h_0$  (in green),  $h_1$  (in black),  $h_2$  (in red),  $h_3$  (in blue) are the fitted  $\Delta I/I$  values corresponding to the release of proton(s) in the  $S_0$  to  $S_1$ ,  $S_1$  to  $S_2$ ,  $S_2$  to  $S_3$  and  $S_3$  to  $S_0$  transitions, respectively, for each value of the offset. The yellow curve corresponds to the sum of the squares of the residues calculated from the 2<sup>nd</sup> to the 40<sup>th</sup> flash. At pH 6.0, the sum of the squares of the residues was multiplied by -1 for a better visualisation of the curves in the graph.

### Figure 3:

Sequence of the amplitude of the 440 nm-*minus*-424 nm differences using a series of saturating flashes (spaced 400 ms apart). The red full circles, shows the experimental data and the black crosses joined by a continuous line are the fits of the data with the parameters listed in Table 1. Panel A, PSII/Ca at pH 6.0; Panel B, PSII/Sr at pH 6.0; Panel C, PSII/Ca at pH 6.0; Panel D, PSII/Sr at pH 7.0. The samples ( $[\text{Chl}] = 25 \mu\text{g mL}^{-1}$ ) were dark-adapted for 1 h at room temperature before the addition of 100  $\mu\text{M}$  PPBQ dissolved in dimethyl sulfoxide. The  $\Delta I/I$  were measured 100 ms after each flash.



Figure 4:

Time-courses of the absorption changes of bromocresol purple at either 575 nm (Panels A and B) or neutral red at 547 nm (Panels C and D) after the 1<sup>st</sup> flash (black points), the 2<sup>nd</sup> flash (red points), the 3<sup>rd</sup> flash (blue points), and the 4<sup>th</sup> flash (green points) given to either dark-adapted PSII/Ca (Panels A and C) or PSII/Sr (Panels B and D). The dashed lines are spline curves joining the experimental data points. Same other conditions as in Figure 1.

Figure 5:

Time-courses of the absorption change differences 440 nm-*minus*-424 nm after the 1<sup>st</sup> flash (black), the 2<sup>nd</sup> flash (red), the 3<sup>rd</sup> flash (blue), and the 4<sup>th</sup> flash (green) given to either dark-adapted PSII/Ca (Panels A and C) or PSII/Sr (Panels B and D) at either pH 6.0 (Panels A and C) or pH 7.0 (Panels B and D). The dashed lines are a spline curves joining the experimental data points. Same other conditions as in Figure 3.

## References

1. T. Oliver, P. Sánchez-Baracaldo, A.W. Larkum, A.W. Rutherford, T. Cardona, Time-resolved comparative molecular evolution of oxygenic photosynthesis, *Biochim. Biophys. Acta* 1862 (2021) 148400. <https://doi.org/10.1016/j.bbabi.2021.148400>.
2. Y. Umena, K. Kawakami, J-R. Shen, N. Kamiya, Crystal structure of oxygen-evolving Photosystem II at a resolution of 1.9 angstrom, *Nature* 473 (2011) 55–60. <https://doi.org/10.1038/nature09913>
3. M. Suga, F. Akita, K. Hirata, G. Ueno, H. Murakami, Y. Nakajima, T. Shimizu, K. Yamashita, M. Yamamoto, H. Ago, J-R. Shen, Native structure of Photosystem II at 1.95 angstrom resolution viewed by femtosecond X-ray pulses, *Nature* (2015) 517: 99–103. <https://doi.org/10.1038/nature13991>
4. C.J. Gisriel, J. Wang, J. Liu, D.A. Flesher, K.M. Reiss, H-L. Huang, K.R. Yang, W.H. Armstrong, M.R. Gunner, V.S. Batista, R.J. Debus, G.W. Brudvig, High-resolution cryo-electron microscopy structure of Photosystem II from the mesophilic cyanobacterium, *Synechocystis* sp. PCC 6803, *Proc. Natl. Acad. Sci. USA* 119 (2022) e2116765118. <https://doi.org/10.1073/pnas.2116765118>
5. A.R. Holzwarth, M.G. Müller, M. Reus, M. Nowaczyk, J. Sander, M. Rögner, Kinetics and mechanism of electron transfer in intact Photosystem II and in the isolated reaction center: pheophytin is the primary electron acceptor, *Proc. Natl. Acad. Sci. USA* 103 (2006) 6895–6900. <https://doi.org/10.1073/pnas.0505371103>
6. E. Romero, V.I. Novoderezhkin, R. van Grondelle, Quantum design of photosynthesis for bio-inspired solar-energy conversion, *Nature* 543 (2017) 355–365. <https://doi.org/10.1038/nature22012>
7. W. Lubitz, M. Chrysina, N. Cox, Water oxidation in Photosystem II, *Photosynth. Res.* 142 (2019) 105–125. <https://doi.org/10.1007/s11120-019-00648-3>.
8. C. Fufezan, C.-X. Zhang, A. Krieger-Liszkay, A.W. Rutherford, Secondary quinone in Photosystem II of *Thermosynechococcus elongatus*: Semiquinone-iron EPR signals and temperature dependence of electron transfer, *Biochemistry* 44 (2005) 12780–12789. <https://doi.org/10.1021/bi051000k>
9. A. Sedoud, N. Cox, M. Sugiura, W. Lubitz, A. Boussac, A.W. Rutherford, The semiquinone-iron complex of Photosystem II: EPR signals assigned to the low field edge of the ground state doublet of  $Q_A^{\cdot-}Fe^{2+}$  and  $Q_B^{\cdot-}Fe^{2+}$ , *Biochemistry* 50 (2011) 6012–6021. <https://doi.org/10.1021/bi200313p>

10. A. Boussac, M. Sugiura, F. Rappaport, Probing the quinone binding site of Photosystem II from *Thermosynechococcus elongatus* containing either PsbA1 or PsbA3 as the D1 protein through the binding characteristics of herbicides, *Biochim. Biophys. Acta* 1807 (2010) 119–129. <https://doi.org/10.1016/j.bbabi.2010.10.004>
11. S. de Causmaecker, J.S. Douglass, A. Fantuzzi, W. Nitschke, A.W. Rutherford, Energetics of the exchangeable quinone, Q<sub>B</sub>, in Photosystem II, *Proc. Natl. Acad. Sci. USA* 116 (2019) 19458–19463. [www.pnas.org/cgi/doi/10.1073/pnas.1910675116](http://www.pnas.org/cgi/doi/10.1073/pnas.1910675116)
12. P. Joliot, G. Barbieri, R. Chabaud, A new model of photochemical centers in system 2, *Photochem. Photobiol.* 10 (1969) 309–329. <https://doi.org/10.1111/j.1751-1097.1969.tb05696.x>
13. B. Kok, B. Forbush, M. McGloin, Cooperation of charges in photosynthetic O<sub>2</sub> evolution—I. A linear four step mechanism, *Photochem. Photobiol.* 11 (1970) 457–475. <https://doi.org/10.1111/j.1751-1097.1970.tb06017.x>
14. I.D. Young, M. Ibrahim, R. Chatterjee, S. Gul, F.D. Fuller, S. Koroidov, A.S. Brewster, R. Tran, R. Alonso-Mori, T. Kroll, T. Michels-Clark, H. Laksmono, R.G. Sierra, C.A. Stan, R. Hussein, M. Zhang, L. Douthit, M. Kubin, C. de Lichtenberg, L. Vo Pham, H. Nilsson, M. Hon Cheah, D. Shevela, C. Saracini, M.A. Bean, I. Seuffert, D. Sokaras, T-C. Weng, E. Pastor, C. Weninger, T. Fransson, L. Lassalle, P. Bräuer, P. Aller, P.T. Docker, B. Andi, A.M. Orville, J.M. Glowina, S. Nelson, M. Sikorski, D. Zhu, M.S. Hunter, T.J. Lane, A. Aquila, J. E. Koglin, J. Robinson, M. Liang, S. Boutet, A.Y. Lyubimov, M. Uervirojnangkoorn, N.W. Moriarty, D. Liebschner, P.V. Afonine, D.G. Waterman, G. Evans, P. Wernet, H. Dobbek, W.I. Weis, A.T. Brunger, P.H. Zwart, P.D. Adams, A. Zouni, J. Messinger, U. Bergmann, N.K. Sauter, J. Kern, V.K. Yachandra, J.unko Yano, Structure of photosystem II and substrate binding at room temperature, *Nature* 540 (2013) 453–474. <https://doi.org/doi:10.1038/nature20161>
15. J.M. Wang, C.J. Gisriel, K. Reiss, H.L. Huang, W.H. Armstrong, G.W. Brudvig, V.S. Batista, Heterogeneous composition of oxygen-evolving complexes in crystal structures of dark-adapted Photosystem II, *Biochemistry* 60 (2021) 3374–3384. <https://doi.org/10.1021/acs.biochem.1c00611>
16. M. Askerka, G.W. Brudvig, V.S. Batista, The O<sub>2</sub>-evolving complex of Photosystem II: Recent insights from quantum mechanics/molecular mechanics (QM/MM), Extended X-ray absorption fine structure (EXAFS), and femtosecond X-ray crystallography data, *Acc. Chem. Res.* 50 (2017) 41–48. <https://doi.org/10.1021/acs.accounts.6b00405>

17. H. Chen, G.C. Dismukes, D.A. Case, Resolving ambiguous protonation and oxidation states in the oxygen evolving complex of Photosystem II, *J. Phys. Chem. B* 122 (2018), 8654–8664. <https://doi.org/10.1021/acs.jpcc.8b05577>
18. D.A. Pantazis, Evaluation of new low-valent computational models for the oxygen-evolving complex of photosystem II, *Chem. Phys. Lett.* 753 (2020) 137629. <https://doi.org/10.1016/j.cplett.2020.137629>
19. M. Shoji, H. Isobe, S. Yamanaka, M. Suga, F. Akita, J-R. Shen, K. Yamaguchi, On the guiding principles for lucid understanding of the damage-free S<sub>1</sub> structure of the CaMn<sub>4</sub>O<sub>5</sub> cluster in the oxygen evolving complex of photosystem II, *Chem. Phys. Lett.* 627 (2015) 44–52. <https://doi.org/10.1016/j.cplett.2015.03.033>
20. M. Drosou, G. Zahariou, D.A. Pantazis, Orientational Jahn–Teller isomerism in the dark-stable state of nature's water oxidase, *Angew. Chem. Int. Ed.* 60 (2021) 13493–13499. <https://doi-org.insb.bib.cnrs.fr/10.1002/anie.202103425C>
21. M. Ibrahim, T. Fransson, R. Chatterjee, M.H. Cheah, R. Hussein, L. Lassalle, K.D. Sutherlin, I.D. Young, F.D. Fuller, S. Gul, I.S. Kim, P.S. Simon, C. de Lichtenberg, P. Chernev, I. Bogacz, C.C. Pham, A.M. Orville, N. Saichek, T. Northen, A. Batyuk, S. Carbajo, R. Alonso-Mori, K. Tono, S. Owada, A. Bhowmick, R. Bolotovskiy, D. Mendez, N.W. Moriarty, J.M. Holton, H. Dobbek, A.S. Brewster, P.D. Adams, N.K. Sauter, U. Bergmann, A. Zouni, J. Messinger, J. Kern, V.K. Yachandra, J. Yano, Untangling the sequence of events during the S<sub>2</sub> → S<sub>3</sub> transition in Photosystem II and implications for the water oxidation mechanism, *Proc. Nat. Acad. Sci. USA* 117 (2020) 12624–12635. <https://doi.org/10.1073/pnas.2000529117>
22. R. Hussein, M. Ibrahim, A. Bhowmick, P.S. Simon, R. Chatterjee, L. Lassalle, M. Doyle, I. Bogacz, I-S. Kim, MH. Cheah, S. Gul, C. de Lichtenberg, P. Chernev, C.C. Pham, I.D. Young, S. Carbajo, F.D. Fuller, R. Alonso-Mori, A. Batyuk, K.S. Sutherlin, A.S. Brewster, R. Bolotovskiy, D. Mendez, J.M. Holton, N.W. Moriarty, P.D. Adams, U. Bergmann, N.K. Sauter, H. Dobbek, J. Messinger, A. Zouni, J. Kern, V.K. Yachandra, J. Yano, Structural dynamics in the water and proton channels of Photosystem II during the S<sub>2</sub> to S<sub>3</sub> transition, *Nat. Commun.* 12 (2021) 6531. <https://doi.org/10.1038/s41467-021-26781-z>
23. H.J. Li, Y. Nakajima, T. Nomura, M. Sugahara, S. Yonekura, S.K. Chan, T. Nakane, T. Yamane, Y. Umena, M. Suzuki, T. Masuda, T. Motomura, H. Naitow, Y. Matsuura, T. Kimura, K. Tono, S. Owada, Y. Joti, R. Tanaka, E. Nango, F. Akita, M. Kubo, S. Iwata, J-R. Shen, M. Suga, Capturing structural changes of the S<sub>1</sub> to S<sub>2</sub> transition of Photosystem II using

time-resolved serial femtosecond crystallography, *IUCRJ* 8 (2021) 431–443.

<https://doi.org/10.1107/S2052252521002177>

24. M. Suga, F. Akita, K. Yamashita, Y. Nakajima, G. Ueno, H.J. Li, T. Yamane, K. Hirata, Y. Umena, S. Yonekura, L.J. Yu, H. Murakami, T. Nomura, T. Kimura, M. Kubo, S. Baba, T. Kumasaka, K. Tono, M. Yabashi, H. Isobe, K. Yamaguchi, M. Yamamoto, H. Ago, J.-R. Shen, An oxyl/oxo mechanism for oxygen-oxygen coupling in PSII revealed by an x-ray free-electron laser, *Science* 366 (2019) 334–338. <https://doi.org/10.1126/science.aax6998>
25. S.L. Dexheimer, M.P. Klein, Detection of a paramagnetic intermediate in the S<sub>1</sub> state of the photosynthetic oxygen-evolving complex, *J. Am. Chem. Soc.* 114 (1992) 2821–2826. <https://doi.org/10.1021/ja00034a010>
26. T. Yamauchi, H. Mino, T. Matsukawa, A. Kawamori, T.-A. Ono, Parallel polarization electron paramagnetic resonance studies of the S<sub>1</sub>-State manganese cluster in the photosynthetic oxygen-evolving system, *Biochemistry* 36 (1997) 7520–7526. <https://doi.org/10.1021/bi962791g>
27. K.A. Campbell, J.M. Peloquin, D.P. Pham, R.J. Debus, R.D. Britt, Parallel polarization EPR detection of an S<sub>1</sub>-State “Multiline” EPR signal in Photosystem II particles from *Synechocystis* sp. PCC 6803, *J. Am Chem. Soc.* 120 (1998) 447–448. <https://doi.org/10.1021/ja972693y>
28. G.C. Dismukes, Y. Siderer, Intermediates of a polynuclear manganese center involved in photosynthetic oxidation of water, *Proc. Natl. Acad. Sci. U. S. A.* 78 (1981), 274–278. <https://doi.org/10.1073/pnas.78.1.274>
29. J.M. Peloquin, K.A. Campbell, D.W. Randall, M.A. Evanchik, V.L. Pecoraro, W.H. Armstrong, R.D. Britt, Mn-55 ENDOR of the S<sub>2</sub>-state multiline EPR signal of Photosystem II: Implications on the structure of the tetranuclear Mn cluster, *J. Am. Chem. Soc.* 122 (2000) 10926–10942. <https://doi.org/10.1021/ja002104f>
30. N. Cox, L. Rapatskiy, J.-H. Su, D.A. Pantazis, M. Sugiura, L. Kulik, P. Dorlet, A.W. Rutherford, F. Neese, A. Boussac, W. Lubitz, J. Messinger, Effect of Ca<sup>2+</sup>/Sr<sup>2+</sup> substitution on the electronic structure of the oxygen-evolving complex of Photosystem II: A combined multifrequency EPR, Mn-55-ENDOR, and DFT study of the S<sub>2</sub> state, *J. Am Chem. Soc.* 133 (2011) 3635–3648. <https://doi.org/10.1021/ja110145v>
31. J.-L. Zimmermann, A.W. Rutherford, Electron paramagnetic resonance studies of the oxygen-evolving enzyme of Photosystem II, *Biochim. Biophys. Acta* 767 (1984), 160–167. [https://doi.org/10.1016/0005-2728\(84\)90091-4](https://doi.org/10.1016/0005-2728(84)90091-4)

32. J.L. Casey, K. Sauer, Electron paramagnetic resonance detection of a cryogenically photogenerated intermediate in photosynthetic oxygen evolution, *Biochim. Biophys. Acta* 767 (1984), 21–28. [https://doi.org/10.1016/0005-2728\(84\)90075-6](https://doi.org/10.1016/0005-2728(84)90075-6)
33. A. Boussac, S. Un, O. Horner, A.W. Rutherford, High spin states ( $S \geq 5/2$ ) of the photosystem II manganese complex, *Biochemistry* 37 (1998), 4001–4007. <https://doi.org/10.1021/bi9728710>
34. A. Boussac, H. Kuhl, S. Un, M. Rögner, A.W. Rutherford, Effect of near-infrared light on the  $S_2$ -state of the manganese complex of photosystem II from *Synechococcus elongatus*, *Biochemistry* 37 (1998), 8995–9000. <https://doi.org/10.1021/bi980195b>
35. A. Boussac, I. Ugur, A. Marion, M. Sugiura, V.R.I. Kaila, A.W. Rutherford, The low spin - high spin equilibrium in the  $S_2$ -state of the water oxidizing enzyme, *Biochim. Biophys. Acta* 1859 (2018), 342–356. <https://doi.org/10.1016/j.bbabi.2018.02.010>
36. A. Boussac, Temperature dependence of the high-spin  $S_2$  to  $S_3$  transition in Photosystem II: Mechanistic consequences, *Biochim. Biophys. Acta* 1860 (2019) 508–518. <https://doi.org/10.1016/j.bbabi.2019.05.001>
37. D.A. Pantazis, W. Ames, N. Cox, W. Lubitz, F. Neese, Two interconvertible structures that explain the spectroscopic properties of the oxygen-evolving complex of Photosystem II in the  $S_2$  state, *Angew. Chem. Intl. Ed.* 51 (2012), 9935–9940. <https://doi.org/10.1002/anie.201204705>
38. T.A. Corry, P.J. O'Malley, Proton isomers rationalize the high- and low-spin forms of the  $S_2$  state intermediate in the water-oxidizing reaction of Photosystem II, *J. Phys. Chem. Lett.* 10 (2019) 5226–5230. <https://doi.org/10.1021/acs.jpcclett.9b01372>
39. T.A. Corry, P.J. O'Malley, Molecular identification of a high-spin deprotonated intermediate during the  $S_2$  to  $S_3$  transition of nature's water-oxidizing complex, *J. Am. Chem. Soc.* 142 (2020) 10240–10243. <https://doi.org/10.1021/jacs.0c01351>
40. D.A. Pantazis, Missing pieces in the puzzle of biological water oxidation, *ACS Catal.* 8 (2018) 9477–9507. <https://doi.org/10.1021/acscatal.8b01928>
41. D. Narzi, D. Bovi, L. Guidoni, Pathway for Mn-cluster oxidation by tyrosine-Z in the  $S_2$  state of photosystem II, *Proc. Nat. Aca. Sci. USA* 111 (2014) 8723–8728. <https://doi.org/10.1073/pnas.1401719111>
42. P.E.M. Siegbahn, The  $S_2$  to  $S_3$  transition for water oxidation in PSII (Photosystem II), revisited, *Phys. Chem. Chem. Phys.* 20 (2018) 22926–22931. <https://doi.org/10.1039/C8CP03720E>

43. Y. Sanakis, J. Sarrou, G. Zahariou, V. Petrouleas, Q-band electron paramagnetic resonance studies of the  $S_3$  state of the OEC of Photosystem II In: Allen J.F., Gantt E., Golbeck J.H., Osmond B. (eds), 2008, Photosynthesis. Energy from the Sun. Springer, Dordrecht.  
[https://doi.org/10.1007/978-1-4020-6709-9\\_108](https://doi.org/10.1007/978-1-4020-6709-9_108)
44. A. Boussac, M. Sugiura, A.W. Rutherford, P. Dorlet, Complete EPR spectrum of the  $S_3$ -state of the oxygen-evolving photosystem II, *J. Am. Chem. Soc.* 131 (2009) 5050–5051.  
<https://doi.org/10.1021/ja900680t>
45. N. Cox, M. Retegan, F. Neese, D.A. Pantazis, A. Boussac, W. Lubitz, Electronic structure of the oxygen evolving complex in photosystem II prior to O-O bond formation, *Science* 345 (2014) 804–808. <https://doi.org/10.1126/science.1254910>
46. D.A. Marchiori, R.J. Debus, R.D. Britt, Pulse EPR spectroscopic characterization of the  $S_3$  state of the oxygen-evolving complex of Photosystem II isolated from *Synechocystis*, *Biochemistry* 59 (2020) 4864–4872. <https://doi.org/10.1021/acs.biochem.0c00880>
47. G. Zahariou, N. Ioannidis, Y. Sanakis, D.A. Pantazis, Arrested substrate binding resolves catalytic intermediates in higher-plant water oxidation, *Angew. Chem. Intl. Ed.* 60 (2020) 3156–3162. <https://doi.org/10.1002/anie.202012304>
48. K.G.V. Havelius, J-H. Su, Y. Feyziyev, F. Mamedov, S. Styring, Spectral resolution of the split EPR signals induced by illumination at 5 K from the  $S_1$ ,  $S_3$ , and  $S_0$  states in Photosystem II, *Biochemistry* 45 (2006) 9279–9290. <https://doi.org/10.1021/bi060698e>
49. A. Boussac, M. Sugiura, T-L. Lai, A.W. Rutherford, Low-temperature photochemistry in Photosystem II from *Thermosynechococcus elongatus* induced by visible and near-infrared light, *Phil. Trans. R. Soc. London Ser. B* 363 (2008) 1203–1210.  
<https://doi.org/10.1098/rstb.2007.2216>
50. V. Krewald, F. Neese, D.A. Pantazis, Implications of structural heterogeneity for the electronic structure of the final oxygen-evolving intermediate in Photosystem II, *J. Inorg. Biochem.* 199 (2019) 110797. <https://doi.org/10.1016/j.jinorgbio.2019.110797>
51. M. Drosou, D.A. Pantazis, Redox isomerism in the  $S_3$  state of the oxygen-evolving complex resolved by coupled cluster theory, *Chem. Eur. J.* 27 (2021) 12815–12825.  
<https://doi.org/10.1002/chem.202101567>
52. H. Isobe, M. Shoji, T. Suzuki, J-R. Shen, Spin, valence, and structural isomerism in the  $S_3$  state of the oxygen-evolving complex of Photosystem II as a manifestation of multimetallic cooperativity, *J. Chem. Theory Comput.* 15 (2019) 2375–2391.  
<https://doi.org/10.1021/acs.jctc.8b01055>

53. H. Isobe, M. Shoji, T. Suzuki, J-R. Shen, K. Yamaguchi, Exploring reaction pathways for the structural rearrangements of the Mn cluster induced by water binding in the S<sub>3</sub> state of the oxygen evolving complex of Photosystem II, *J. Photochem. Photobiol. A: Chemistry* 405 (2021) 112905. <https://doi.org/10.1016/j.jphotochem.2020.112905>
54. A. Klauss, M. Haumann, H. Dau, Seven steps of alternating electron and proton transfer in Photosystem II water oxidation traced by time-resolved photothermal beam deflection at improved sensitivity, *J. Phys. Chem. B* 119 (2015) 2677–2689. <https://doi.org/10.1021/jp509069p>
55. I. Zaharieva, H. Dau, M. Haumann, Sequential and coupled proton and electron transfer events in the S<sub>2</sub> → S<sub>3</sub> transition of photosynthetic water oxidation revealed by time-resolved X-ray absorption spectroscopy, *Biochemistry* 55 (2016) 6996–7004. <https://doi.org/10.1021/acs.biochem.6b01078>
56. Y. Okamoto, Y. Shimada, R. Nagao, T. Noguchi, Proton and water transfer pathways in the S<sub>2</sub> → S<sub>3</sub> transition of the water-oxidizing complex in Photosystem II: Time-resolved infrared analysis of the effects of D1-N298A mutation and NO<sub>3</sub>-substitution, *J. Phys. Chem. B* 125 (2021) 6864–6873. <https://doi.org/10.1021/acs.jpccb.1c03386>
57. S.M. Mausle, A. Abzaliyeva, P. Greife, P.S. Simon, R. Perez, Y. Zilliges, H. Dau, Activation energies for two steps in the S<sub>2</sub> → S<sub>3</sub> transition of photosynthetic water oxidation from time-resolved single-frequency infrared spectroscopy, *J. Chem. Phys.* 153 (2020) 215101. <https://doi.org/10.1063/5.0027995>
58. A. Boussac, J. Sellés, M. Sugiura, What can we still learn from the electrochromic band-shifts in Photosystem II? *Biochim. Biophys. Acta* 1861 (2020) 148176. <https://doi.org/10.1016/j.bbabi.2020.148176>
59. V. Förster, W. Junge, Stoichiometry and kinetics of proton release upon photosynthetic water oxidation, *Photochem. Photobiol.* 41 (1985) 183–190. <https://doi.org/10.1111/j.1751-1097.1985.tb03469.x>
60. F. Rappaport, J. Lavergne, Proton release during successive oxidation steps of the photosynthetic water oxidation process - stoichiometries and pH-dependence, *Biochemistry* 30 (1991) 10004–10012. <https://doi.org/10.1021/bi00105a027>
61. J. Lavergne, Improved UV-visible spectra of the S-transitions in the photosynthetic oxygen-evolving system, *Biochim. Biophys. Acta*, 1060 (1991) 175–188. [https://doi.org/10.1016/S0005-2728\(09\)91005-2](https://doi.org/10.1016/S0005-2728(09)91005-2)



62. M. Sugiura, A. Boussac, T. Noguchi, F. Rappaport, Influence of Histidine-198 of the D1 subunit on the properties of the primary electron donor, P680, of Photosystem II in *Thermosynechococcus elongatus*, *Biochim Biophys Acta* 1777 (2008) 331–342.  
<https://doi.org/10.1016/j.bbabi.2008.01.007>
63. M. Sugiura, Y. Inoue, Highly purified thermo-stable oxygen evolving Photosystem II core complex from the thermophilic cyanobacterium *Synechococcus elongatus* having His-tagged CP43. *Plant Cell Physiol* 40 (1999) 1219–1231.  
<https://doi.org/10.1093/oxfordjournals.pcp.a029510>
64. N. Ishida, M. Sugiura, F. Rappaport, T-L. Lai, A.W. Rutherford, A. Boussac, Biosynthetic exchange of bromide for chloride and strontium for calcium in the Photosystem II oxygen-evolving enzymes, *J. Biol. Chem.* 283 (2008) 13330–13340.  
<https://doi.org/10.1074/jbc.M710583200>
65. M. Sugiura, T. Taniguchi, N. Tango, M. Nakamura, J. Sellés, A. Boussac, Probing the role of arginine 323 of the D1 protein in Photosystem II function, *Physiol. Plant.* 171 (2021) 183–199. <https://doi.org/10.1111/ppl.13115>
66. D. Béal, F. Rappaport, P. Joliot, A new high-sensitivity 10-ns time-resolution spectrophotometric technique adapted to in vivo analysis of the photosynthetic apparatus, *Rev. Sci. Instrum.* 70 (1999) 202–207. <https://doi.org/10.1063/1.1149566>
67. M. Sugiura, T. Tibiletti, I. Takachi, Y. Hara, S. Kanawaku, J. Sellés, A. Boussac, Probing the role of Valine 185 of the D1 protein in the Photosystem II oxygen evolution, *Biochim. Biophys. Acta* 1859 (2018) 1259–1273. <https://doi.org/10.1016/j.bbabi.2018.10.003>
68. F. Müh, A. Zouni, Extinction coefficients and critical solubilisation concentrations of Photosystems I and II from *Thermosynechococcus elongatus*, *Biochim. Biophys. Acta* 1708 (2005) 219–228. <https://doi.org/10.1016/j.bbabi.2005.03.005>
69. H. Nilsson, F. Rappaport, A. Boussac, J. Messinger, Substrate-water exchange in Photosystem II is arrested before dioxygen formation, *Nat. Commun.* 5 (2014) 4305.  
<https://doi.org/10.1038/ncomms5305>
70. F. Rappaport, M. Blanchard-Desce, J. Lavergne, Kinetics of electron-transfer and electrochromic change during the redox transitions of the photosynthetic oxygen-evolving complex, *Biochim. Biophys. Acta* 1184 (1994) 178–192. [https://doi.org/10.1016/0005-2728\(94\)90222-4](https://doi.org/10.1016/0005-2728(94)90222-4)
71. C. Berthomieu, R. Hienerwadel, Iron coordination in Photosystem II: Interaction between bicarbonate and the Q(B) pocket studied by Fourier transform infrared spectroscopy, *Biochemistry* 40 (2001) 4044–4052. <https://doi.org/10.1021/bi002236l>

72. M. Kimura, Y. Kato, T. Noguchi, Protonation state of a key histidine ligand in the iron-quinone complex of Photosystem II as revealed by light-induced ATR-FTIR spectroscopy, *Biochemistry* 59 (2020) 4336–4343. <https://doi.org/10.1021/acs.biochem.0c00810>
73. M. Haumann, W. Junge, Extent and rate of proton release by photosynthetic water oxidation in thylakoids: electrostatic relaxation versus chemical production, *Biochemistry* 33 (1994) 864–872. <https://doi.org/10.1021/bi00170a003>
74. M. Retegan, N. Cox, W. Lubitz, F. Neese, D.A. Pantazis, The first tyrosyl radical intermediate formed in the S<sub>2</sub>-S<sub>3</sub> transition of Photosystem II, *Phys. Chem. Chem. Phys.* 16 (2014) 11901–11910. <https://doi.org/10.1039/C4CP00696H>
75. I. Ugur, A.W. Rutherford, V.R.I. Kaila, Redox-coupled substrate water reorganization in the active site of Photosystem II - The role of calcium in substrate water delivery, *Biochim. Biophys. Acta* 1857 (2016) 740–748. <https://doi.org/10.1016/j.bbabi.2016.01.015>
76. J. Wang, M. Askerka, G.W. Brudvig, V.S. Batista, Crystallographic data support the carousel mechanism of water supply to the oxygen evolving complex of Photosystem II, *ACS Energy Lett.* 2 (2017) 2299–2306. <https://doi.org/10.1021/acsenerylett.7b00750>
77. D. Kaur, W. Szejgis, JJ. Mao, M. Amin, K.M. Reiss, M. Askerka, X.H. Cai, U. Khaniya, Y.Y. Zhang, G.W. Brudvig, V.S. Batista, M.R. Gunner, Relative stability of the S<sub>2</sub> isomers of the oxygen evolving complex of Photosystem II, *Photosynth. Res.* 14 (2019) 331–341. <https://doi.org/10.1007/s11120-019-00637-6>
78. P.E.M. Siegbahn, Water oxidation mechanism in Photosystem II, including oxidations, proton release pathways, O—O bond formation and O<sub>2</sub> release, *Biochim. Biophys. Acta* 1827 (2013) 1003–1019. <http://dx.doi.org/10.1016/j.bbabi.2012.10.006>
79. K.R. Yang, K.V. Lakshmi, G.W. Brudvig, V.S. Batista, Is deprotonation of the oxygen-evolving complex of Photosystem II during the S<sub>1</sub> → S<sub>2</sub> transition suppressed by proton quantum delocalization?, *J. Am. Chem. Soc.* 143 (2021) 8324–8332. <https://doi.org/10.1021/jacs.1c00633>
80. D.A. Pantazis, The S<sub>3</sub> state of the oxygen-evolving complex: Overview of spectroscopy and XFEL crystallography with a critical evaluation of early-onset models for O—O bond formation, *Inorganics* 7 (2019) 55. <https://doi.org/10.3390/inorganics7040055>
81. H. Suzuki, M. Sugiura, T. Noguchi, Monitoring proton release during photosynthetic water oxidation in Photosystem II by means of isotope-edited infrared spectroscopy, *J. Am. Chem. Soc.* 131 (2009) 7849–7857. <https://doi.org/10.1021/ja901696m>

82. G. Bernát, F. Morvaridi, Y. Feyziyev, S. Styring, pH dependence of the four individual transitions in the catalytic S-cycle during photosynthetic oxygen evolution, *Biochemistry* 41 (2002) 5830–5843. <https://doi.org/10.1021/bi011691u>
83. R.J. Debus, Alteration of the O<sub>2</sub>-producing Mn<sub>4</sub>Ca cluster in Photosystem II by the mutation of a metal ligand, *Biochemistry* 60 (2021) 3841–3855. <https://doi.org/10.1021/acs.biochem.1c00504>
84. M. Amin, D. Kaur, M.R. Gunner, G. Brudvig, Toward understanding the S<sub>2</sub>-S<sub>3</sub> transition in the Kok cycle of Photosystem II: Lessons from Sr-substituted structure, *Inorg. Chem. Commun.* 133 (2021) 108890. <https://doi.org/10.1016/j.inoche.2021.108890>
85. S. Taguchi, T. Noguchi, H. Mino, Molecular structure of the S<sub>2</sub> state with a g=5 signal in the oxygen evolving complex of Photosystem II, *J. Phys. Chem. B*, 124 (2020) 5531–5537. <https://doi.org/10.1021/acs.jpcc.0c02913>
86. Y. Kato, T. Shibamoto, S. Yamamoto, T. Watanabe, N. Ishida, M. Sugiura, F. Rappaport, A. Boussac, Influence of the PsbA1/PsbA3, Ca<sup>2+</sup>/Sr<sup>2+</sup> and Cl<sup>-</sup>/Br<sup>-</sup> exchanges on the redox potential of the primary quinone Q<sub>A</sub> in Photosystem II from *Thermosynechococcus elongatus* as revealed by spectroelectrochemistry, *Biochim. Biophys. Acta* 1817 (2012) 1998–2004. <https://doi.org/10.1016/j.bbabi.2012.06.006>
87. Y. Kato, A. Ohira, R. Nagao, T. Noguchi, Does the water-oxidizing Mn<sub>4</sub>CaO<sub>5</sub> cluster regulate the redox potential of the primary quinone electron acceptor Q<sub>A</sub> in photosystem II? A study by Fourier transform infrared spectroelectrochemistry, *Biochim. Biophys. Acta* 1860 (2019) 148082. <https://doi.org/10.1016/j.bbabi.2019.148082>
88. Y. Kato, H. Watanabe, T. Noguchi, ATR-FTIR spectroelectrochemical study on the mechanism of the pH dependence of the redox potential of the non-heme iron in Photosystem II, *Biochemistry* 60 (2021) 2170–2178.

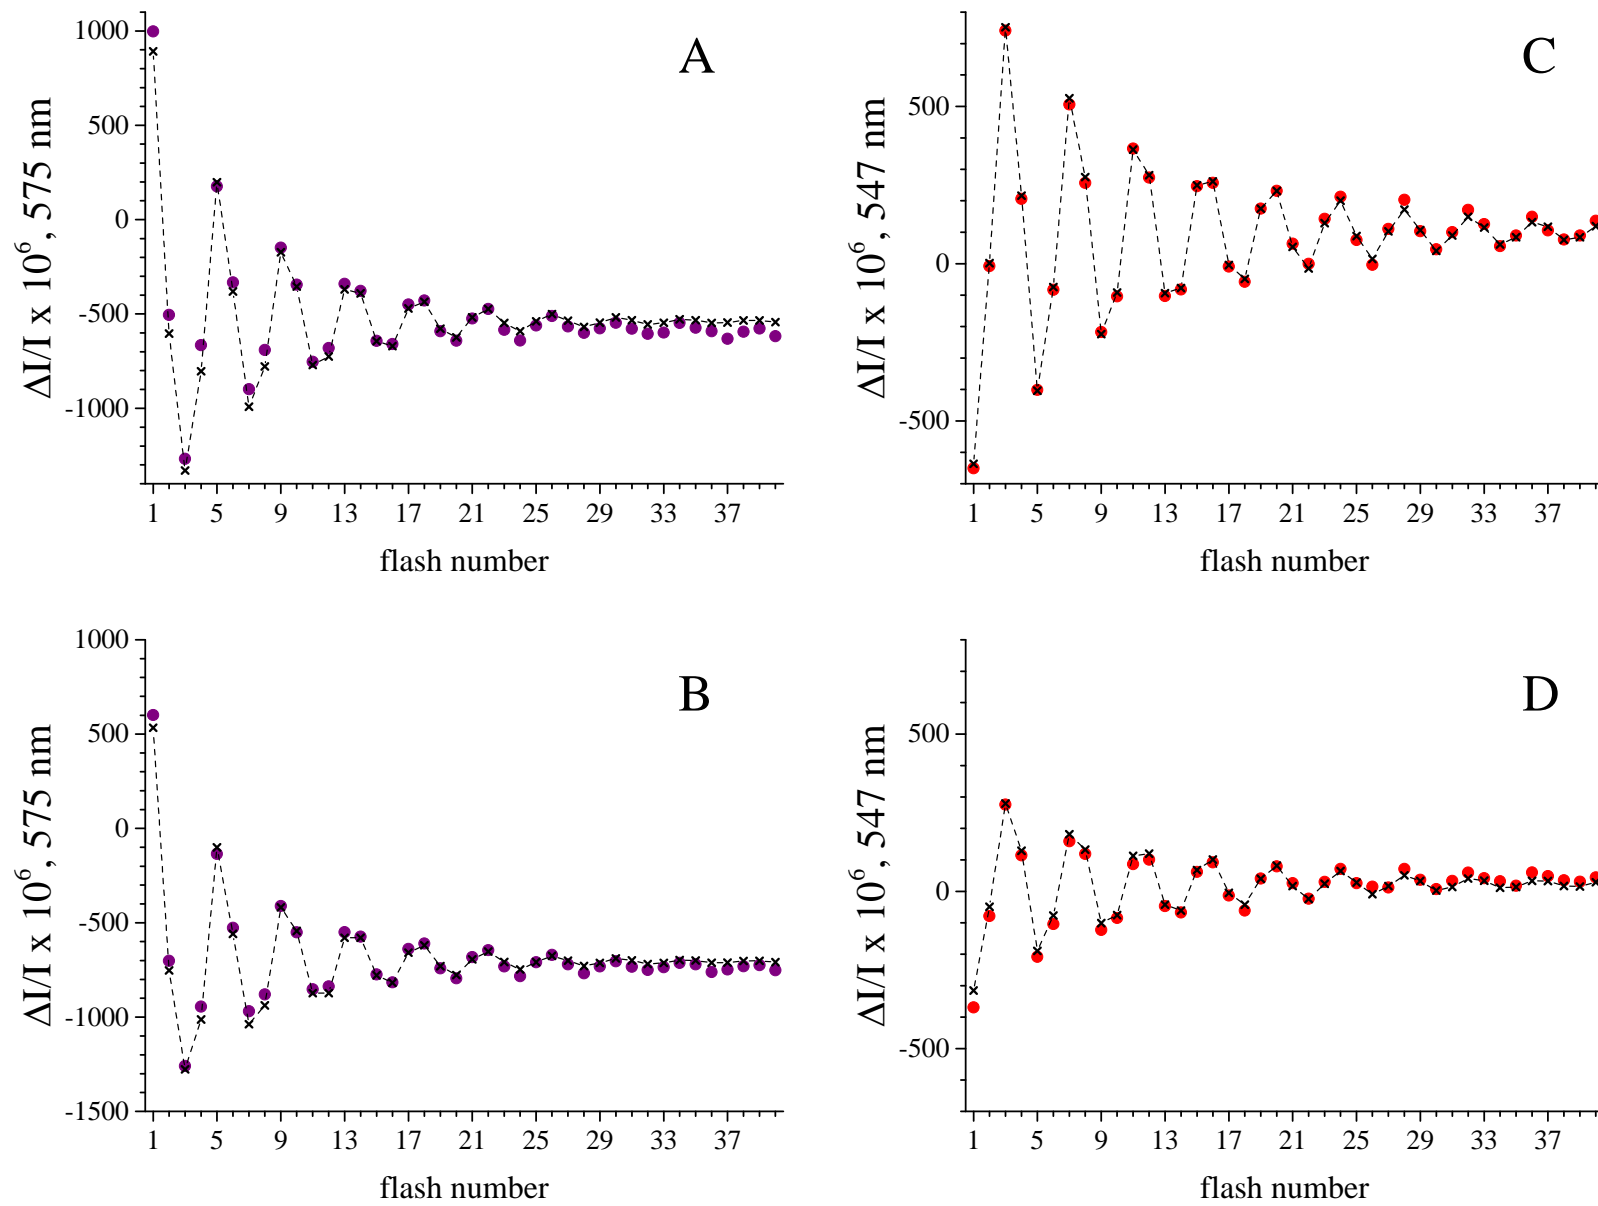

Fig. 1

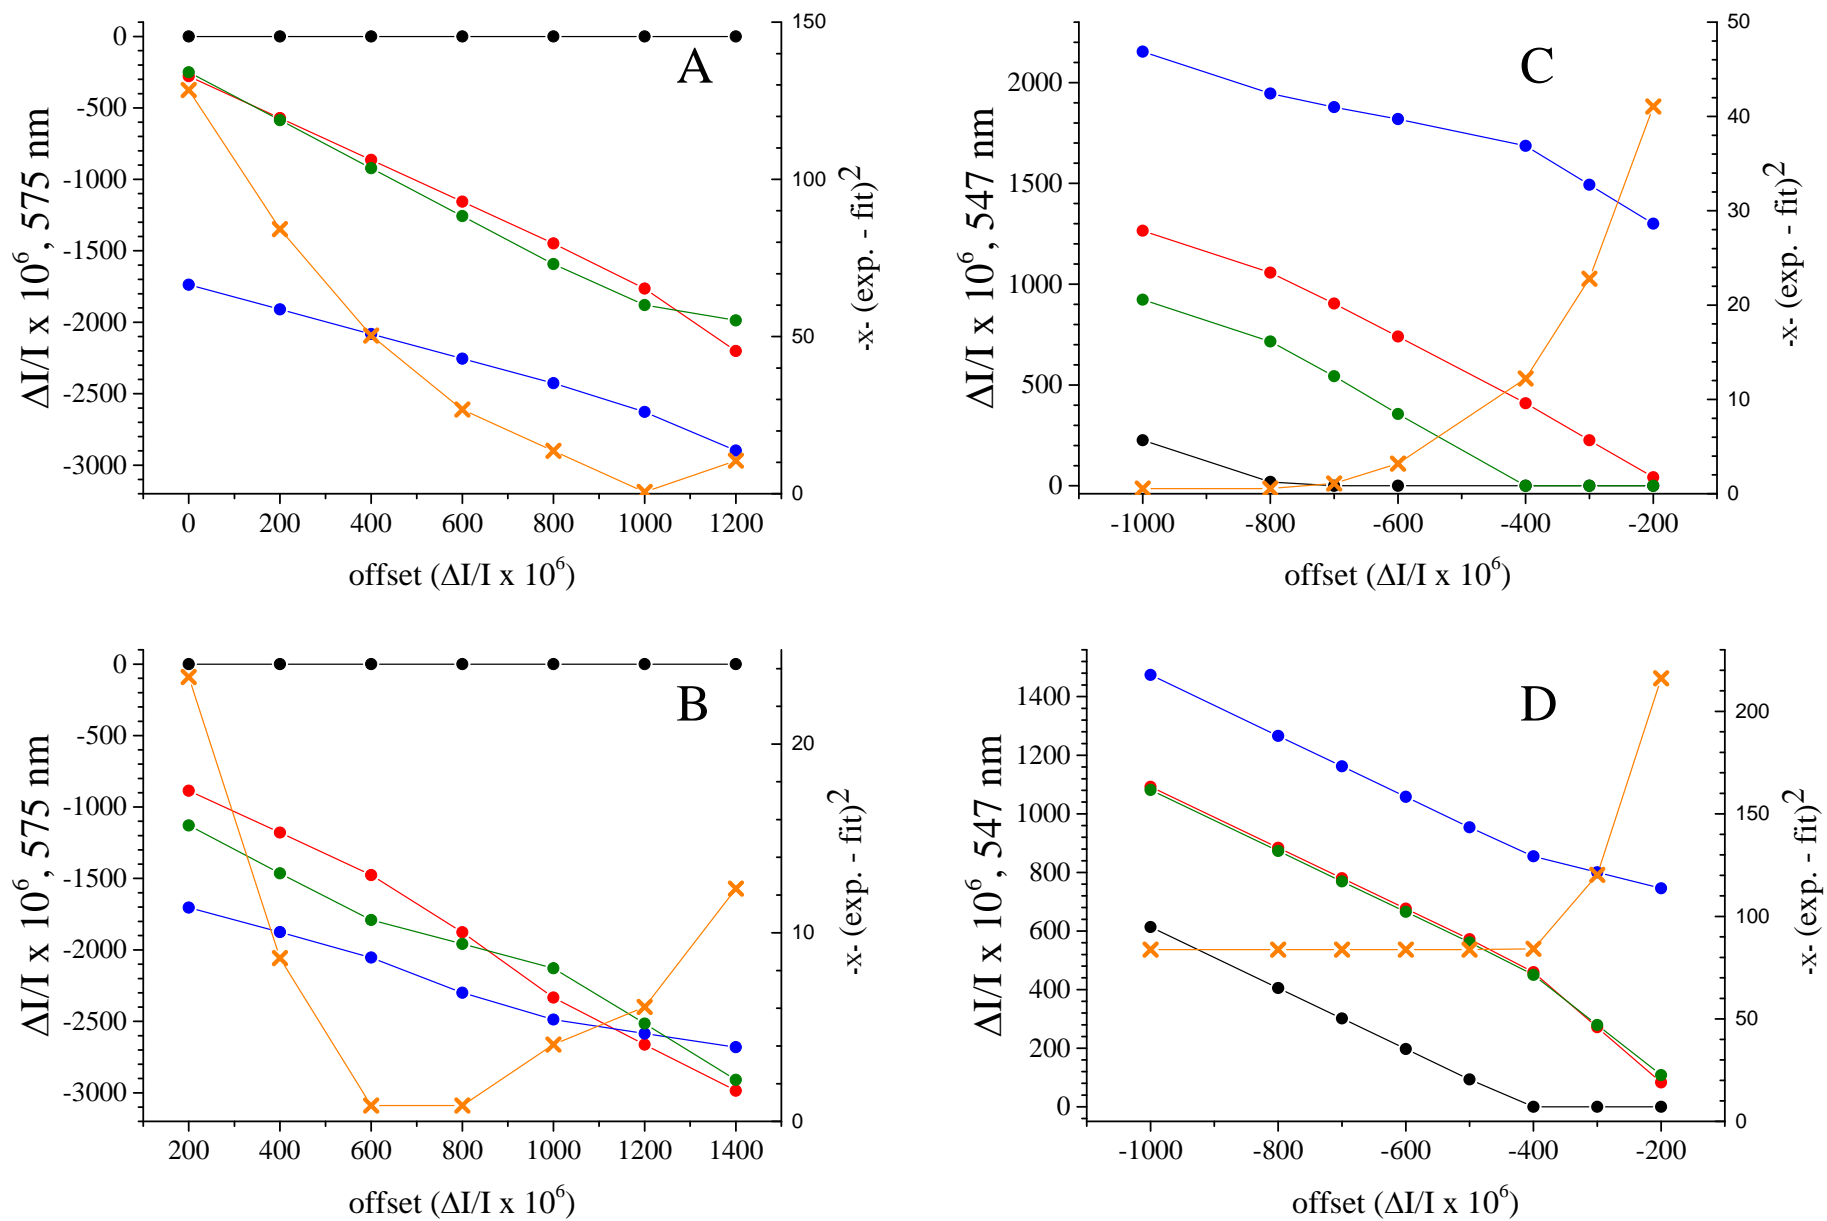

Fig. 2

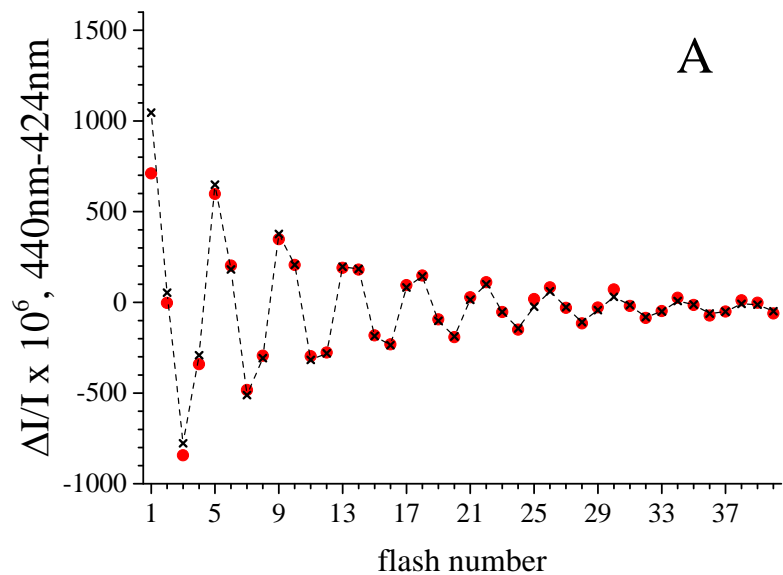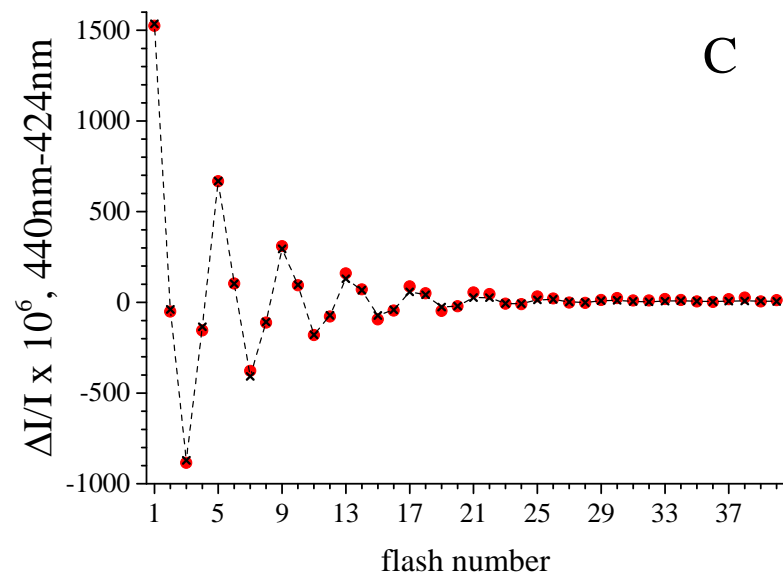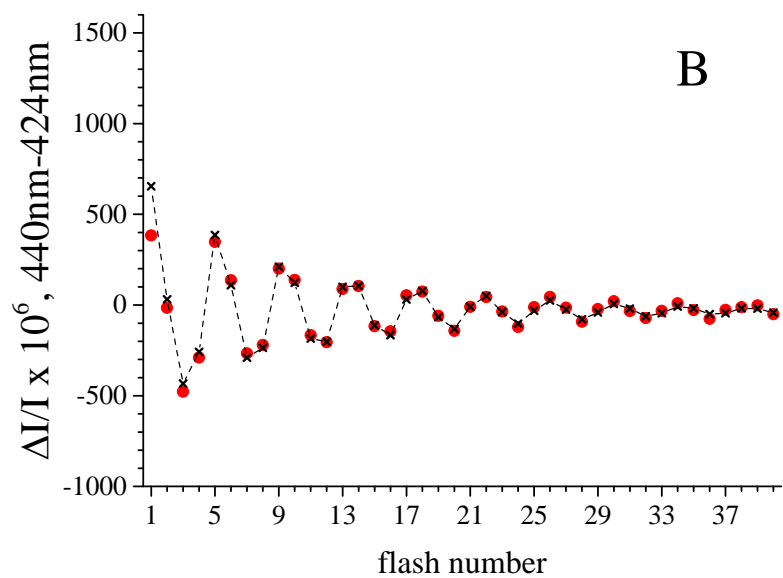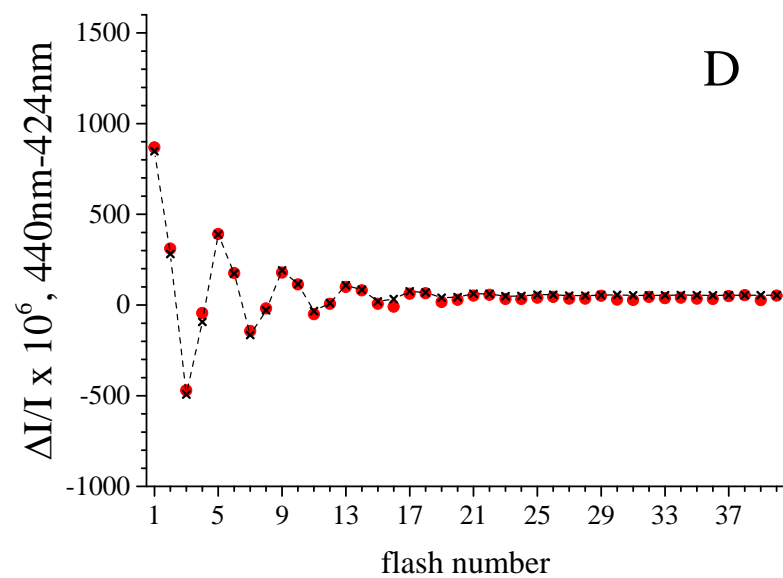

**Fig. 3**

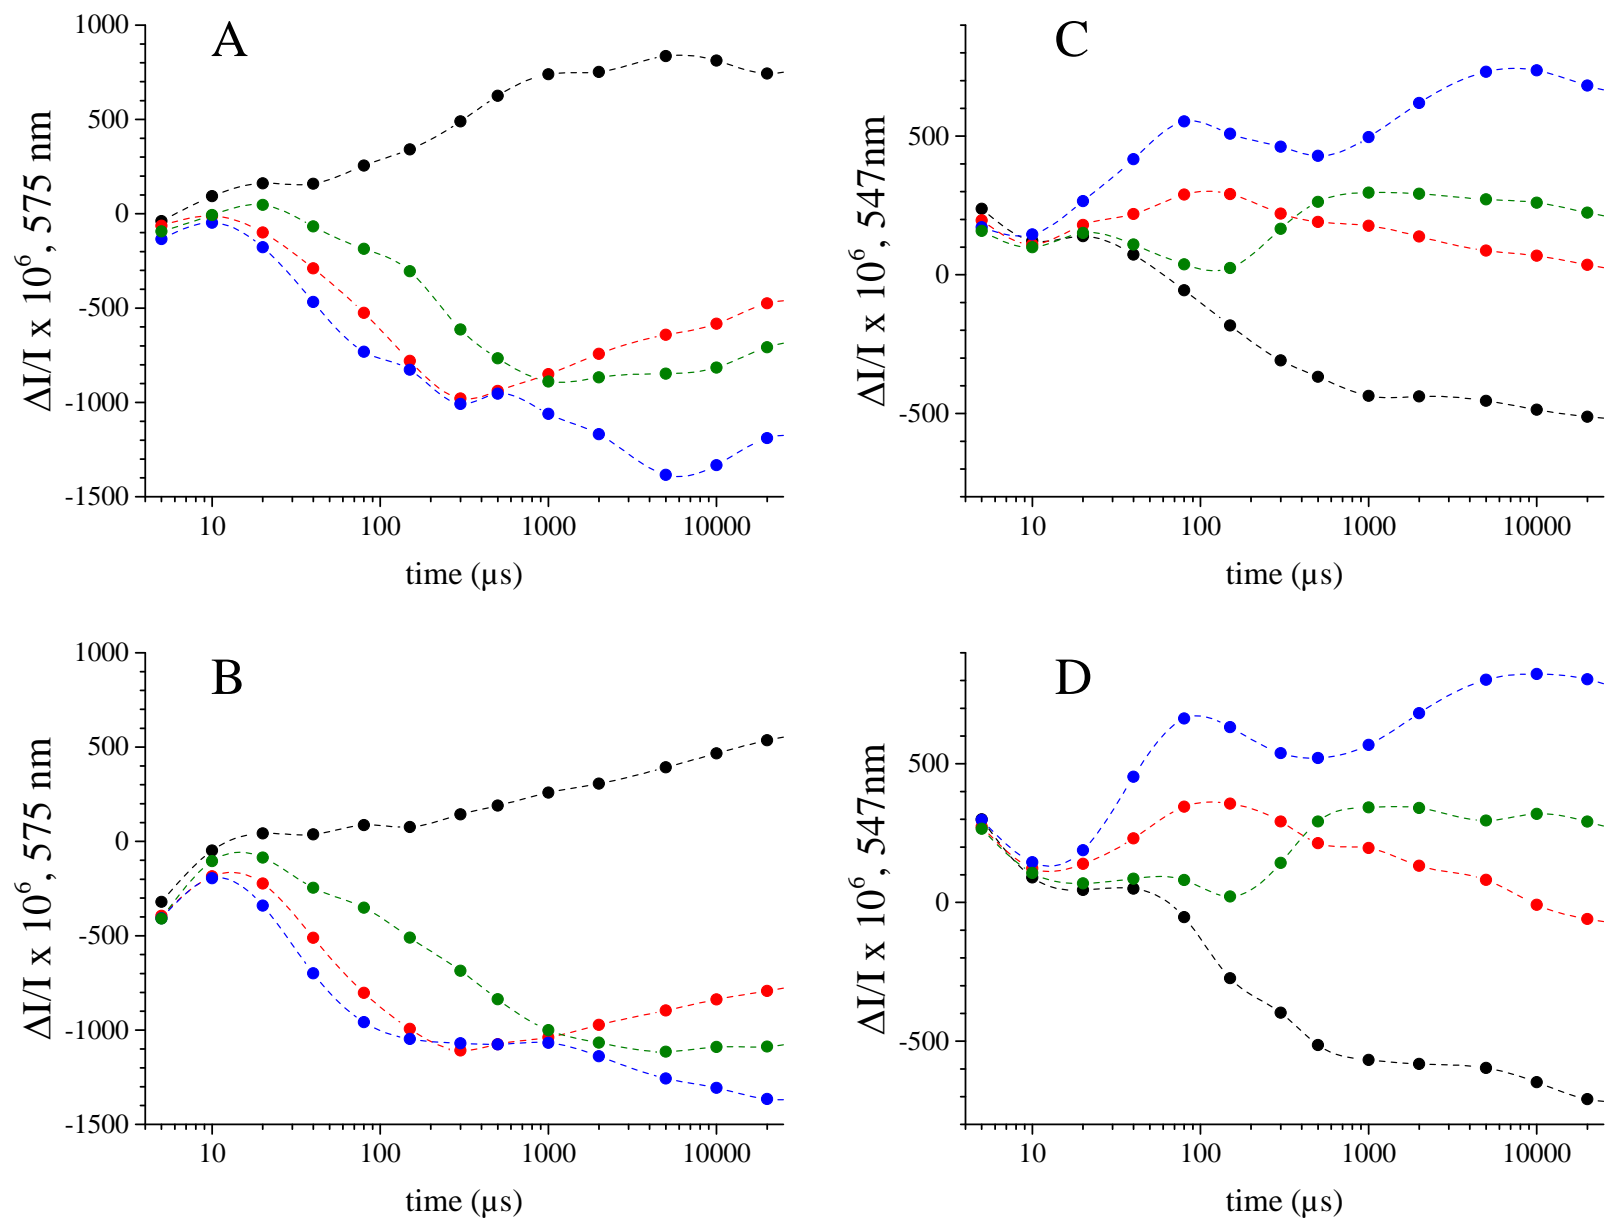

Fig. 4

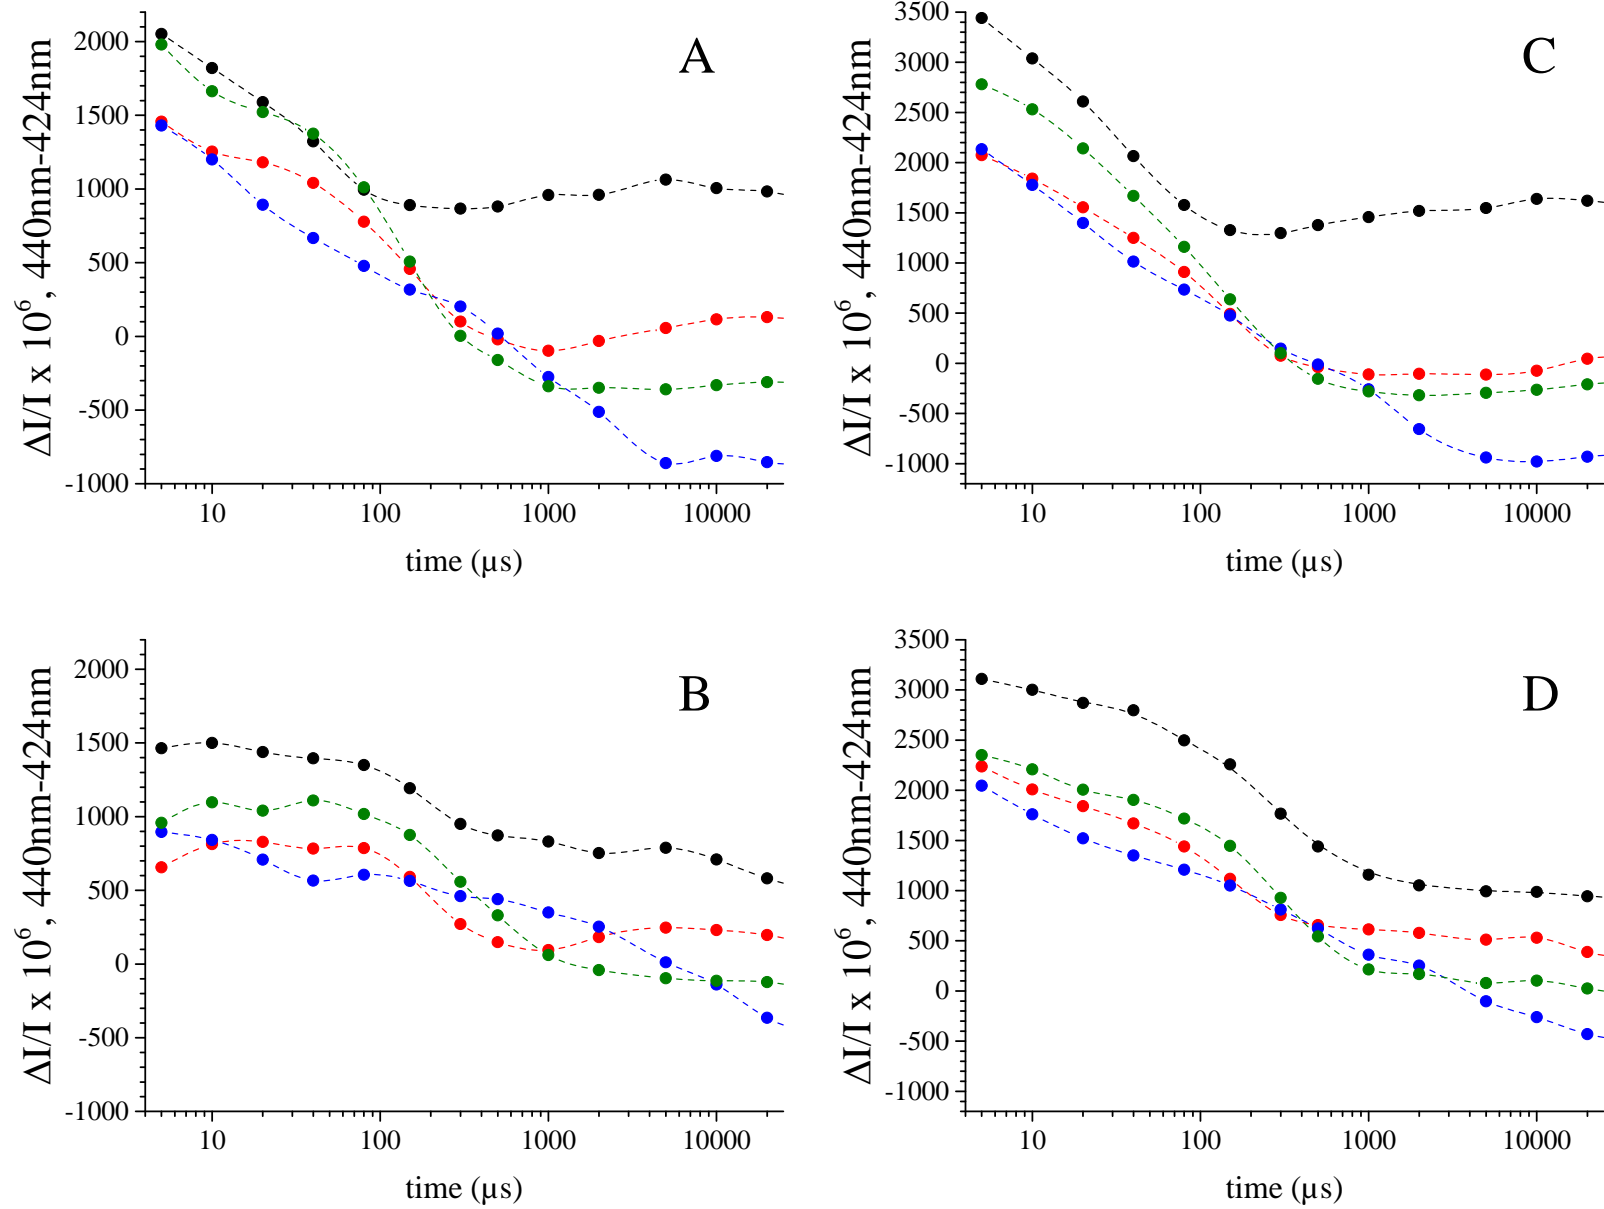

Fig. 5
